# Supplementary material for: Decoding the dynamics of calves’ respiratory and gut microbiota: exploring stability, resistance, and individual patterns
Source: Research Square preprint supplement (doi:10.21203/rs.3.rs-6411889/v1), 2025-04-10
Supplement: Supplementary file 1 [file e9d4fc9437cd53056f978d41.xlsx]

## Sheet: Supplementary.Table.S1
Animal_ID	Project	Time_point_day	Day_after_arrival	Pen	Sex	Rectal_T	Ocular_mucose	Nasal_discharge	Couching	Lung_sounds_Right	Lung_sounds_Left	Diarrhea	Clinical_Score	fecal pH	Fecal potential Redox, mv	Total_SCFA	Acetate_Percentage	Propinate_Percentage	Isobutyrate_Percentage	Isovaleric_Percentage	Butyrate_Percentage	Valeric_Percentage	Treated_Tulathromycin_individual	Treated_Sulfadimidine_Trimethoprim_individual	Treated_Tylosin_individual	Treated_Florfenicol_individual	Treated_Ampicilin_Colistin_collective	Treated_Amoxiciline_collective	Treated_Colistin_collective	Treated_Doxycyclin_collective	Treated_Tilmicosin_collective	IFN_G pg/mL	IL_1a pg/mL	IL_1b pg/mL	IL_4 pg/mL	IL_6 pg/mL	IL_8 pg/mL	IL_10 pg/mL	IL_17a pg/mL	IP_10 pg/mL	MCP_1 pg/mL	MIP_1b pg/mL	Milk_intake_L	Straw_intake_g	Total_intake	Milk_Fat_Intake_g	Milk_Protein_Intake_g	Straw_Fat_intake_g	Straw_Protein_intake_g
258	PREVENTER	1	2	2	Female	39.4	normal	0	0	0	0	YES	0.96	7.837	161.4	0.257452	68.4812	18.2907	2.39521	2.39521	6.26021	2.17746	NO	NO	NO	NO	NO	NO	NO	NO	NO	5.72	0.46	6.71	12.8	32.09	148548	63.58	3.85	889.86	607.64	40.29	0	0	0.1	0	0	0	0
3559	PREVENTER	1	2	2	Female	39	redness	0	0	0	0	NO	1.44	7.363	125.4	0.356494	47.8279	25.4066	4.09718	5.64134	13.4445	3.58246	NO	NO	NO	NO	NO	NO	NO	NO	NO	2.02	1.72	6.71	12.8	20.35	6804	42.6	1.57	418.71	328.96	45.46	0	0	0.1	0	0	0	0
7911	PREVENTER	1	2	1	Female	39.9	normal	0	0	0	0	YES	0.96	7.163	78	0.569749	81.3312	11.7695	0.892857	0.324675	5.68182	0	NO	YES	YES	NO	NO	NO	NO	NO	NO	.	.	.	.	.	.	.	.	.	.	.	0	0	0.1	0	0	0	0
1654	PREVENTER	9	10	1	Female	39.1	normal	0	1	0.5	0.5	YES	2.16	NA	NA	NA	NA	NA	NA	NA	NA	NA	NO	NO	NO	NO	NO	NO	YES	YES	NO	.	.	.	.	.	.	.	.	.	.	.	4.11	0	4.31	91.02	103.32	0	0
6063	PREVENTER	9	10	1	Female	38.1	normal	0	0	0.5	0.5	YES	0.48	8.132	97.3	NA	NA	NA	NA	NA	NA	NA	NO	NO	NO	NO	NO	NO	YES	YES	NO	12.39	2.79	6.71	12.8	41.46	7240	59.01	3.28	2016	863.19	135.18	4.11	0	4.31	91.02	103.32	0	0
258	PREVENTER	16	17	3	Female	38.9	normal	0	0	0	0	NO	0	8.053	94.3	0.250027	65.6146	19.4579	2.93353	3.4534	6.7954	1.74527	NO	NO	NO	NO	NO	NO	YES	YES	YES	10.77	1.21	6.71	12.8	43.3	42113	51.84	4.97	1582	674.46	101.98	4.647	30	5.47	107.485	122.01	0.39	10.5
7911	PREVENTER	16	17	1	Female	38.6	normal	0	0	0	0	YES	0	5.639	172.7	0.210441	79.7448	20.2552	0	0	0	0	NO	YES	YES	NO	NO	NO	YES	YES	YES	.	.	.	.	.	.	.	.	.	.	.	4.647	30	5.47	107.485	122.01	0.39	10.5
596	PREVENTER	1	2	2	Female	39.4	normal	0	0	0	0	NO	0.96	7.313	121.2	0.145472	66.7698	17.4505	2.22772	3.09406	8.47772	1.9802	NO	NO	NO	NO	NO	NO	NO	NO	NO	.	.	.	.	.	.	.	.	.	.	.	0	0	0.1	0	0	0	0
3723	PREVENTER	1	2	2	Female	39.1	normal	0	0	0	0	NO	0.96	7.317	137.3	0.200727	59.9888	20.8193	2.97419	3.42312	12.514	0.280584	NO	NO	NO	NO	NO	NO	NO	NO	NO	14.43	0.46	6.71	12.8	30.18	10042	154.1	2.64	1080	830.54	101.92	0	0	0.1	0	0	0	0
7946	PREVENTER	1	2	1	Female	39.2	redness	0	0	0	0	NO	1.44	8.114	128.9	0.200447	72.8074	16.891	1.85615	1.90255	5.15081	1.39211	NO	NO	NO	NO	NO	NO	NO	NO	NO	11.42	2.87	6.71	12.8	4.04	52282	83.24	2.28	809.44	595.54	226.05	0	0	0.1	0	0	0	0
2734	PREVENTER	9	10	2	Female	38.6	normal	0	0	0.5	0.5	YES	0.48	NA	NA	NA	NA	NA	NA	NA	NA	NA	NO	NO	NO	NO	NO	NO	YES	YES	NO	20.12	2.64	6.71	12.8	26.31	148548	116.4	1.71	3420	1173	175.13	4.11	0	4.31	91.02	103.32	0	0
7291	PREVENTER	9	10	1	Female	38.8	normal	0	2	1.5	1.5	YES	2.88	5.505	164.9	0.312135	68.0322	25.1646	0	0.0731529	5.70593	1.02414	NO	NO	NO	NO	NO	NO	YES	YES	NO	31.14	4.53	6.71	12.8	31.22	10006	102.32	0.91	3420	921.03	313.98	4.11	0	4.31	91.02	103.32	0	0
3723	PREVENTER	16	17	1	Female	38	normal	0	0	0	0	YES	0	NA	NA	NA	NA	NA	NA	NA	NA	NA	NO	NO	NO	NO	NO	NO	YES	YES	YES	.	.	.	.	.	.	.	.	.	.	.	4.647	30	5.47	107.485	122.01	0.39	10.5
7320	PREVENTER	9	10	2	Female	38.8	normal	0	0	0	0	NO	0	8.11	155.1	0.220081	57.1523	22.2185	5.2649	6.19205	8.27815	0.89404	YES	NO	NO	NO	NO	YES	YES	YES	NO	5.15	1.83	6.71	12.8	4.04	22737	44.92	2.21	2732	670.45	142.2	4.11	0	4.31	91.02	103.32	0	0
3991	PREVENTER	30	31	2	Female	38.7	normal	0	0	0	0	YES	0	7.762	123.4	0.289047	66.6667	22.3524	1.12847	1.04167	6.42361	2.38715	NO	NO	NO	NO	YES	NO	NO	YES	NO	.	.	.	.	.	.	.	.	.	.	.	6.293	110	7.6	149.11	169.26	1.43	38.5
7984	PREVENTER	16	17	2	Female	38.9	normal	0	0	0	0	YES	0	8.818	96.2	NA	NA	NA	NA	NA	NA	NA	YES	NO	NO	NO	NO	NO	YES	YES	YES	.	.	.	.	.	.	.	.	.	.	.	4.647	30	5.47	107.485	122.01	0.39	10.5
8076	PREVENTER	1	2	1	Female	39.2	redness	0	0	0	0	YES	1.44	8.2	105.2	NA	NA	NA	NA	NA	NA	NA	NO	NO	NO	NO	NO	NO	NO	NO	NO	16.56	0.46	0.18	54.73	8.49	113622	70.44	2.07	3216	708.54	78.14	0	0	0.1	0	0	0	0
7327	PREVENTER	9	10	1	Female	38.9	normal	0	0	0	0	NO	0	8.431	159.6	0.236825	78.9347	20.5046	0	0	0.560673	0	NO	NO	NO	NO	NO	NO	YES	YES	NO	13.2	4.73	6.71	12.8	35.22	3498	53.51	9.37	1555	837.58	292.3	4.11	0	4.31	91.02	103.32	0	0
4299	PREVENTER	16	17	1	Female	39	normal	0	0	0.5	0.5	NO	1.44	8.04	773.5	NA	NA	NA	NA	NA	NA	NA	NO	NO	NO	YES	NO	YES	YES	YES	YES	2.27	0.46	6.71	12.8	90.61	2035	71.72	16.71	1945	637.05	76.12	4.647	30	5.47	107.485	122.01	0.39	10.5
8076	PREVENTER	16	17	1	Female	38.7	normal	0	0	0	0	NO	0	NA	NA	0.218469	69.8344	19.2429	0.90694	0.709779	7.61041	1.69558	NO	NO	NO	NO	NO	NO	YES	YES	YES	57.9	3.18	0.68	12.8	7.14	35748	184.64	1.56	3420	1139	204.2	4.647	30	5.47	107.485	122.01	0.39	10.5
929	PREVENTER	1	2	2	Female	39.5	normal	0	0	0	0	NO	0.96	7.513	118	0.440053	41.3519	24.8907	6.00398	9.26441	17.4155	1.07356	NO	NO	NO	NO	NO	NO	NO	NO	NO	9.59	0.46	6.71	12.8	20.55	8.53	50.04	6.81	242.6	401.94	187.41	0	0	0.1	0	0	0	0
8480	PREVENTER	1	2	2	Female	39.1	normal	0	0	0	0	NO	0.96	6.486	168.4	0.221655	45.2953	20.4512	3.50252	4.60077	20.095	6.05521	YES	NO	NO	NO	NO	NO	NO	NO	NO	9.03	0.46	0.18	12.8	71.21	19980	117.85	3.22	1887	709.88	141.28	0	0	0.1	0	0	0	0
3220	PREVENTER	9	10	2	Female	38.6	normal	0	0	0	0	YES	0	NA	NA	NA	NA	NA	NA	NA	NA	NA	NO	NO	NO	NO	NO	YES	YES	YES	NO	16.57	0.93	6.71	12.8	14.15	148548	50.11	2	2515	1205	104.49	4.11	0	4.31	91.02	103.32	0	0
7396	PREVENTER	9	10	1	Female	38.2	normal	0	0	0	0	NO	0	7.801	138.4	0.176983	66.3964	23.2266	1.17552	1.01338	7.82327	0.364816	NO	NO	NO	NO	NO	NO	YES	YES	NO	16.35	0.46	6.71	12.8	4.04	7913	45.21	3.14	221.09	596.09	83.95	4.11	0	4.31	91.02	103.32	0	0
8480	PREVENTER	16	17	2	Female	38.6	normal	0	1	0	0	NO	0.72	7.881	160.7	0.296722	63.7168	21.37	1.27827	1.27827	11.275	1.08161	YES	NO	NO	NO	NO	NO	YES	YES	YES	10.5	2.36	1.54	12.8	17.88	13692	84.53	1.2	3199	664.46	138.57	4.647	30	5.47	107.485	122.01	0.39	10.5
6061	PREVENTER	1	2	1	Female	38	redness	0	0	0	0	NO	0.48	7.26	-77.8	0.38452	49.4918	23.414	3.50508	5.09989	16.0182	2.47108	NO	NO	NO	NO	NO	NO	NO	NO	NO	8.33	0.46	6.71	12.8	4.04	23615	41.06	3.51	1642	481.74	71.48	0	0	0.1	0	0	0	0
3291	PREVENTER	9	10	1	Female	38.3	normal	0	0	0	0	NO	0	8.382	82.8	NA	NA	NA	NA	NA	NA	NA	NO	NO	NO	NO	NO	NO	YES	YES	NO	12.01	0.02	6.71	12.8	8.49	139999	60.19	4.37	2132	995.76	420.57	4.11	0	4.31	91.02	103.32	0	0
7741	PREVENTER	9	10	1	Female	38.6	normal	0	0	0	0	NO	0	7.364	136	0.273521	66.7457	32.6216	0	0.0790826	0.553578	0	YES	NO	NO	NO	NO	NO	YES	YES	NO	3.06	0.46	6.71	12.8	14.15	148548	92.17	0.33	2369	640.19	161.88	4.11	0	4.31	91.02	103.32	0	0
6061	PREVENTER	16	17	1	Female	39	normal	0	0	1	1	NO	1.92	8.448	77.1	0.171601	74.2066	15.753	2.42354	2.19273	5.19331	0.230814	NO	NO	NO	NO	NO	NO	YES	YES	YES	35.61	0.46	6.71	12.8	23.89	6008	68.05	5.52	3420	726.28	105.98	4.647	30	5.47	107.485	122.01	0.39	10.5
9729	PREVENTER	16	17	1	Female	37.5	normal	0	0	0	0	NO	0	8.384	108.2	0.189478	73.3302	15.9351	2.05153	2.05153	6.29771	0.333969	NO	NO	NO	NO	NO	NO	YES	YES	YES	6.17	4.76	49.51	87.28	44.54	8.53	89.58	4.37	3420	1016	205.07	4.647	30	5.47	107.485	122.01	0.39	10.5
1654	PREVENTER	1	2	1	Female	39.5	normal	0	0	0	0	YES	0.96	NA	NA	NA	NA	NA	NA	NA	NA	NA	NO	NO	NO	NO	NO	NO	NO	NO	NO	.	.	.	.	.	.	.	.	.	.	.	0	0	0.1	0	0	0	0
6063	PREVENTER	1	2	1	Female	39.6	normal	0	0	0	0	NO	0.96	6.956	150.4	0.285118	43.1197	18.3805	4.14804	6.01093	21.3612	6.97963	NO	NO	NO	NO	NO	NO	NO	NO	NO	22.84	0.46	6.71	12.8	28.25	25033	97.99	6.08	3420	717.91	248.96	0	0	0.1	0	0	0	0
3559	PREVENTER	9	10	2	Female	38.2	normal	0	0	0	0	NO	0	7.556	155.2	0.275339	62.4393	29.6021	0.905856	0.905856	4.17341	1.97347	NO	NO	NO	NO	NO	NO	YES	YES	NO	10.83	0.46	6.71	12.8	57.73	41939	87.78	4.55	3420	481.8	479.86	4.11	0	4.31	91.02	103.32	0	0
6063	PREVENTER	16	17	1	Female	38.7	normal	0	1	0.5	0.5	NO	1.2	8.12	100.4	0.291859	81.6999	11.827	0.998185	0.998185	3.75076	0.725953	NO	NO	NO	NO	NO	NO	YES	YES	YES	9.17	12.76	6.71	12.8	9.81	3987	89.91	5.39	2317	712.18	99.28	4.647	30	5.47	107.485	122.01	0.39	10.5
2734	PREVENTER	1	2	2	Female	37	normal	1	0	0	0	YES	0.48	NA	NA	NA	NA	NA	NA	NA	NA	NA	NO	NO	NO	NO	NO	NO	NO	NO	NO	26.88	2.22	6.71	12.8	12.01	148548	65.3	2.5	3420	731.15	83.2	0	0	0.1	0	0	0	0
7291	PREVENTER	1	2	1	Female	39.5	normal	0	0	0	0	YES	0.96	8.204	112.2	0.245743	68.5693	20.3113	2.74277	2.37213	4.596	1.40845	NO	NO	NO	NO	NO	NO	NO	NO	NO	9.83	4.12	6.71	12.8	13.19	1579	109.08	0.77	3420	526.49	86.01	0	0	0.1	0	0	0	0
596	PREVENTER	9	10	2	Female	39.3	normal	0	0	0	0	YES	0.96	NA	NA	NA	NA	NA	NA	NA	NA	NA	NO	NO	NO	NO	NO	NO	YES	YES	NO	.	.	.	.	.	.	.	.	.	.	.	4.11	0	4.31	91.02	103.32	0	0
3723	PREVENTER	9	10	1	Female	36.5	normal	0	0	0	0	NO	0	8.038	113.6	0.238223	67.5127	21.7378	1.88116	2.17976	5.70319	0.985369	NO	NO	NO	NO	NO	NO	YES	YES	NO	5.4	0.46	6.71	12.8	18.32	1734	64.87	1.28	804.27	741.42	102.96	4.11	0	4.31	91.02	103.32	0	0
7946	PREVENTER	9	10	1	Female	38.7	normal	0	0	0	0	YES	0	NA	NA	NA	NA	NA	NA	NA	NA	NA	NO	NO	NO	NO	NO	NO	YES	YES	NO	11.89	8.3	6.71	20.11	16.25	77831	82.67	3.42	1679	845.31	220.71	4.11	0	4.31	91.02	103.32	0	0
7291	PREVENTER	16	17	1	Female	38.3	normal	0	0	0	0	NO	0	7.852	71.9	0.176831	68.1863	20.8824	2.0098	1.66667	7.10784	0.147059	NO	NO	NO	NO	NO	NO	YES	YES	YES	6.06	10.86	6.71	12.8	5.79	3058	113.33	0.33	3420	777.6	154.36	4.647	30	5.47	107.485	122.01	0.39	10.5
645	PREVENTER	9	10	1	Female	38.6	normal	0	0	0	0	NO	0	7.822	67.4	NA	NA	NA	NA	NA	NA	NA	YES	NO	NO	YES	YES	YES	YES	YES	NO	14.91	1.05	6.71	12.8	4.04	26172	95.43	2	864.37	615.77	62.06	4.11	0	4.31	91.02	103.32	0	0
7984	PREVENTER	9	10	2	Female	38.7	normal	0	0	0	0	YES	0	NA	NA	NA	NA	NA	NA	NA	NA	NA	YES	NO	NO	NO	NO	NO	YES	YES	NO	.	.	.	.	.	.	.	.	.	.	.	4.11	0	4.31	91.02	103.32	0	0
7327	PREVENTER	1	2	1	Female	38.1	redness	1	0	0	0	YES	0.96	7.226	129	0.19088	74.4828	15.5172	1.31034	1.44828	7.24138	0	NO	NO	NO	NO	NO	NO	NO	NO	NO	10.21	0.46	6.71	12.8	9.16	19996	87.98	6.95	714.35	782.59	99.04	0	0	0.1	0	0	0	0
744	PREVENTER	9	10	2	Female	38.8	normal	1	0	0.5	0.5	NO	0.96	7.537	154.3	0.237439	64.7266	22.8334	1.2472	1.0873	8.50656	1.59898	NO	NO	NO	NO	NO	NO	YES	YES	NO	16.23	11.94	6.71	54.73	4.04	3952	63.12	2.07	388.94	723.64	65.04	4.11	0	4.31	91.02	103.32	0	0
4299	PREVENTER	9	10	1	Female	38.8	normal	0	0	0.5	0.5	YES	0.48	7.819	157.4	0.215854	75.6372	22.1695	0.533491	0.592768	1.06698	0	NO	NO	NO	YES	NO	YES	YES	YES	NO	5.38	0.46	6.71	54.04	16.25	12639	63.3	5.53	2253	662.86	78.38	4.11	0	4.31	91.02	103.32	0	0
8076	PREVENTER	9	10	1	Female	38.9	normal	0	0	0	0	YES	0	7.346	114.3	0.467748	61.4871	33.9847	0	0.0953289	3.33651	1.09628	NO	NO	NO	NO	NO	NO	YES	YES	NO	7.46	2.79	0.18	15.66	4.04	43283	72.04	2.79	2121	715.68	103.75	4.11	0	4.31	91.02	103.32	0	0
7327	PREVENTER	16	17	1	Female	38.9	normal	0	0	0.5	0.5	YES	0.48	8.358	95	0.298864	69.0114	20.8175	2.09125	1.42586	6.27376	0.380228	NO	NO	NO	NO	NO	NO	YES	YES	YES	9.89	2.1	6.71	12.8	6.47	2059	81.74	9.23	1564	714.34	46.35	4.647	30	5.47	107.485	122.01	0.39	10.5
3220	PREVENTER	1	2	2	Female	38.5	redness	0	0	0	0	YES	0.48	7.72	-30.4	NA	NA	NA	NA	NA	NA	NA	NO	NO	NO	NO	NO	YES	NO	NO	NO	19.52	2.03	6.71	12.8	4.04	148548	51.26	2.57	3420	1079	107.61	0	0	0.1	0	0	0	0
929	PREVENTER	9	10	3	Female	37.8	normal	0	0	0.5	0.5	NO	0.48	7.065	169.6	0.225321	66.0175	21.9023	1.15721	1.24189	8.63675	1.04431	NO	NO	NO	NO	NO	NO	YES	YES	NO	24.12	1.29	6.71	52.18	45.88	8.53	49.9	5.66	1625	389.12	254.3	4.11	0	4.31	91.02	103.32	0	0
4365	PREVENTER	9	10	2	Female	38.8	normal	0	0	0	0	YES	0	NA	NA	0.233192	77.3802	13.4627	1.698	1.63736	4.6695	1.15221	NO	NO	NO	YES	NO	NO	YES	YES	NO	8.96	0.46	6.71	12.8	4.04	26266	57.29	4.97	902.45	856.16	67.93	4.11	0	4.31	91.02	103.32	0	0
7396	PREVENTER	16	17	1	Female	39.3	normal	0	0	0	0	YES	0.96	NA	NA	NA	NA	NA	NA	NA	NA	NA	NO	NO	NO	NO	NO	NO	YES	YES	YES	13.05	1.48	6.71	12.8	12.01	6700	115.83	2.28	1242	636	185.06	4.647	30	5.47	107.485	122.01	0.39	10.5
3291	PREVENTER	1	2	1	Female	39.1	redness	0	1	0	0	NO	2.16	6.91	46.9	0.157166	73.7022	14.2077	2.04918	3.00546	6.48907	0.546448	NO	NO	NO	NO	NO	NO	NO	NO	NO	26.43	0.46	6.71	12.8	9.81	86058	82.24	14.06	3420	1551	127.49	0	0	0.1	0	0	0	0
1139	PREVENTER	9	10	3	Female	NA	normal	0	0	0	0	NO	0	8.077	NA	0.114063	62.9412	24.7451	1.56863	1.68627	8.66667	0.392157	NO	NO	NO	NO	NO	NO	YES	YES	NO	8.86	0.46	6.71	12.8	9.84	15759	61.92	1.92	1870	484.78	90.18	4.11	0	4.31	91.02	103.32	0	0
6061	PREVENTER	9	10	1	Female	38.5	normal	0	0	1	1	NO	0.96	7.76	182.7	0.302495	63.177	29.8877	0.924703	0.792602	4.98679	0.231176	NO	NO	NO	NO	NO	NO	YES	YES	NO	82.21	0.46	6.71	12.8	4.04	7469	209.66	2.64	3420	1112	251.32	4.11	0	4.31	91.02	103.32	0	0
9729	PREVENTER	9	10	1	Female	38.6	normal	0	0	0	0	NO	0	6.515	206.9	0.373664	60.0794	39.9206	0	0	0	0	NO	NO	NO	NO	NO	NO	YES	YES	NO	1.25	0.46	0.18	12.8	39.22	35178	39.17	2.93	2146	638.62	131.45	4.11	0	4.31	91.02	103.32	0	0
7741	PREVENTER	16	17	1	Female	38.6	normal	0	0	0.5	0.5	YES	0.48	NA	NA	NA	NA	NA	NA	NA	NA	NA	YES	NO	NO	NO	NO	NO	YES	YES	YES	4.97	1.09	6.71	12.8	4.04	13165	134.24	5.04	1451	661.84	291.61	4.647	30	5.47	107.485	122.01	0.39	10.5
258	PREVENTER	30	31	3	Female	38	normal	0	0	1	1	NO	0.96	7.942	NA	0.17991	74.2641	16.5265	0.967199	0.841043	6.26577	1.13541	NO	NO	NO	NO	NO	NO	NO	YES	NO	18	1.05	6.71	12.8	4.04	16907	64.3	0.33	1892	505.68	361.27	6.293	110	7.6	149.11	169.26	1.43	38.5
3559	PREVENTER	30	31	2	Female	40	normal	0	0	1.5	1.5	YES	2.4	8.81	NA	NA	NA	NA	NA	NA	NA	NA	NO	NO	NO	NO	NO	NO	NO	YES	NO	12.21	0.97	6.71	12.8	37.75	3217	133.68	3.56	1629	568.42	411.22	6.293	110	7.6	149.11	169.26	1.43	38.5
7911	PREVENTER	30	31	1	Female	39.1	normal	0	0	1	1	NO	1.92	8.288	138.2	0.278849	65.7168	17.6166	3.88601	4.05872	6.43351	2.28843	NO	YES	YES	NO	NO	NO	NO	YES	NO	.	.	.	.	.	.	.	.	.	.	.	6.293	110	7.6	149.11	169.26	1.43	38.5
1654	PREVENTER	58	59	2	Female	38.9	normal	0	1	1	2	NO	2.16	7.756	111.2	0.254313	73.0665	16.2144	1.28901	1.32293	6.98779	1.1194	NO	NO	NO	NO	NO	NO	NO	NO	NO	.	.	.	.	.	.	.	.	.	.	.	8.878	150	10.66	220.15	214.2	1.95	52.5
6063	PREVENTER	58	59	1	Female	39.1	normal	0	2	0.5	0	NO	2.64	7.963	91.5	0.273889	72.1298	16.5923	1.82556	1.54158	6.97769	0.933063	NO	NO	NO	NO	NO	NO	NO	NO	NO	4.38	1.95	6.71	12.8	4.04	5333	51.26	3.14	631.94	510.1	106.14	8.878	150	10.66	220.15	214.2	1.95	52.5
258	PREVENTER	91	92	3	Female	39	normal	0	0	0	0	NO	0.96	7.459	124.5	0.197932	65.6059	19.9936	0.96432	0.996464	11.0897	1.35005	NO	NO	NO	NO	NO	NO	NO	NO	NO	19.36	0.81	6.71	12.8	4.04	21694	16.23	0.33	60.54	641.24	67.41	11.073	150	13.29	301.18	293.04	1.95	52.5
3559	PREVENTER	91	92	2	Female	38.9	normal	0	0	1.5	0.5	NO	0.96	6.966	120.6	0.189842	70.2792	17.2667	0.551065	0.440852	10.7641	0.698016	NO	NO	NO	NO	NO	NO	NO	NO	NO	3.03	11.48	6.71	12.8	4.04	3662	69.3	0.33	1163	776.96	135.91	11.073	150	13.29	301.18	293.04	1.95	52.5
7911	PREVENTER	91	92	nursery	Female	NA	NA	NA	NA	NA	NA	YES	0	NA	NA	NA	NA	NA	NA	NA	NA	NA	NO	YES	YES	NO	NO	NO	NO	NO	NO	.	.	.	.	.	.	.	.	.	.	.	11.073	150	13.29	301.18	293.04	1.95	52.5
596	PREVENTER	30	31	2	Female	39.1	normal	0	0	0	0	NO	0.96	7.805	138.1	0.281162	73.0412	17.5548	0.758134	0.591488	6.37738	0.987221	NO	NO	NO	NO	NO	NO	NO	YES	NO	.	.	.	.	.	.	.	.	.	.	.	6.293	110	7.6	149.11	169.26	1.43	38.5
7946	PREVENTER	30	31	1	Female	38.5	normal	0	0	0	0	NO	0	6.731	NA	0.217316	63.3175	15.4578	0.802616	0.832342	18.8763	0.713436	NO	NO	NO	NO	NO	NO	NO	YES	NO	17.18	0.73	6.71	12.8	18.32	59908	30.95	0.33	1246	793.81	303.85	6.293	110	7.6	149.11	169.26	1.43	38.5
2734	PREVENTER	58	59	2	Female	39	normal	0	0	0	0	NO	0.96	7.888	84.5	0.228973	72.198	17.6526	0.902864	0.622665	7.87671	0.747198	NO	NO	NO	NO	NO	NO	NO	NO	NO	8.83	9.77	6.71	12.8	20.35	12354	99.4	0.33	962.25	693.77	251.97	8.878	150	10.66	220.15	214.2	1.95	52.5
7291	PREVENTER	58	59	1	Female	39	normal	0	1	0	1	NO	2.16	7.82	116.9	0.205537	75.4448	15.342	0.948992	0.751285	6.28707	1.22578	NO	NO	NO	NO	NO	NO	NO	NO	NO	3.23	1.39	6.71	12.8	13.86	3751	100.72	1.63	1124	663.52	124.86	8.878	150	10.66	220.15	214.2	1.95	52.5
596	PREVENTER	91	92	2	Female	38.7	normal	0	0	0	0	YES	0	NA	NA	NA	NA	NA	NA	NA	NA	NA	NO	NO	NO	NO	NO	NO	NO	NO	NO	.	.	.	.	.	.	.	.	.	.	.	11.073	150	13.29	301.18	293.04	1.95	52.5
7946	PREVENTER	91	92	2	Female	39.1	normal	0	0	0	1	YES	1.44	NA	NA	NA	NA	NA	NA	NA	NA	NA	NO	NO	NO	NO	NO	NO	NO	NO	NO	6.84	1.36	6.71	12.8	26.31	5798	75.13	1.86	1975	570.15	121.46	11.073	150	13.29	301.18	293.04	1.95	52.5
645	PREVENTER	30	31	nursery	Female	38.7	normal	0	0	0	0	YES	0	NA	NA	NA	NA	NA	NA	NA	NA	NA	YES	NO	NO	YES	YES	YES	NO	YES	NO	1.83	17.34	6.71	12.8	7.54	148548	120.93	5.11	155.03	729.27	569.82	6.293	110	7.6	149.11	169.26	1.43	38.5
3991	PREVENTER	58	59	2	Female	38.7	normal	1	0	1.5	2	NO	2.16	8.015	129	0.338646	74.6619	15.78	1.84851	2.0514	4.53111	1.12714	NO	NO	NO	NO	YES	NO	NO	NO	NO	.	.	.	.	.	.	.	.	.	.	.	8.878	150	10.66	220.15	214.2	1.95	52.5
7984	PREVENTER	30	31	2	Female	38.8	normal	0	0	0	0	NO	0	7.448	168.1	0.162433	67.4112	22.9358	0.95732	0.638213	7.25967	0.797766	YES	NO	NO	NO	NO	NO	NO	YES	NO	.	.	.	.	.	.	.	.	.	.	.	6.293	110	7.6	149.11	169.26	1.43	38.5
2752	PREVENTER	58	59	2	Female	38.3	normal	0	0	0	0	NO	0	7.948	90.4	0.271908	71.1822	16.2774	1.25764	1.07797	9.05498	1.14984	NO	NO	NO	NO	NO	NO	NO	NO	NO	0.47	0.46	6.71	12.8	17.88	51085	48.83	1.35	314.51	618.92	67.44	8.878	150	10.66	220.15	214.2	1.95	52.5
7320	PREVENTER	58	59	2	Female	40.3	normal	0	0	1	0.5	NO	4.56	7.807	139.2	0.180626	74.0152	16.0737	1.33418	1.20712	5.71792	1.65184	YES	NO	NO	NO	NO	YES	NO	NO	NO	12.58	0.89	6.71	12.8	46.96	5101	69.72	2.85	118.3	461.71	47.56	8.878	150	10.66	220.15	214.2	1.95	52.5
3991	PREVENTER	117	118	2	Female	NA	NA	NA	NA	NA	NA	YES	0	NA	NA	NA	NA	NA	NA	NA	NA	NA	NO	NO	NO	NO	YES	NO	NO	NO	NO	.	.	.	.	.	.	.	.	.	.	.	12.94	150	15.19	373.515	363.42	1.95	52.5
7984	PREVENTER	91	92	2	Female	38.8	normal	0	0	1.5	1	NO	1.2	8.41	53.1	0.215351	78.1984	13.9252	0.652742	0.435161	6.09225	0.696258	YES	NO	NO	NO	NO	NO	NO	NO	NO	.	.	.	.	.	.	.	.	.	.	.	11.073	150	13.29	301.18	293.04	1.95	52.5
744	PREVENTER	30	31	2	Female	39.2	normal	0	0	1	1	YES	1.92	7.769	147.3	0.348479	68.6975	19.4441	1.12181	0.987065	7.61546	1.5495	NO	NO	NO	NO	NO	NO	NO	YES	NO	47.58	9.74	6.71	35.41	12.52	7435	130.87	4.01	2415	640.56	243.45	6.293	110	7.6	149.11	169.26	1.43	38.5
4299	PREVENTER	30	31	1	Female	39.4	normal	0	0	1	1	NO	1.92	7.576	154.2	0.24321	66.7139	28.8952	0.377715	0.566572	3.02172	0.424929	NO	NO	NO	YES	NO	YES	NO	YES	NO	2.56	0.46	6.71	12.8	14.15	781.84	43.33	3	764.69	700.6	1429	6.293	110	7.6	149.11	169.26	1.43	38.5
8076	PREVENTER	30	31	1	Female	39.1	normal	0	0	0	0	NO	0.96	7.275	134.4	0.210213	70.5832	15.5385	0.808855	0.553427	11.7071	0.808855	NO	NO	NO	NO	NO	NO	NO	YES	NO	23.43	5.24	0.18	12.8	19.21	39254	164.04	1.06	3420	1032	490.16	6.293	110	7.6	149.11	169.26	1.43	38.5
3054	PREVENTER	58	59	2	Female	38.7	normal	0	0	0	0	NO	0	7.547	80.9	0.268539	69.815	19.5716	0.876339	0.746511	7.59494	1.39565	NO	NO	NO	NO	NO	NO	NO	NO	NO	2.02	0.46	6.71	12.8	5.16	148548	58.15	2.57	958.04	478.5	61.48	8.878	150	10.66	220.15	214.2	1.95	52.5
7327	PREVENTER	58	59	1	Female	38.8	normal	0	0	0	0	NO	0	6.606	163.1	0.342414	62.7211	22.0231	1.10823	1.03749	11.0823	2.02782	NO	NO	NO	NO	NO	NO	NO	NO	NO	8.45	0.46	6.71	12.8	4.04	47745	57.39	5.95	1085	508.03	58.88	8.878	150	10.66	220.15	214.2	1.95	52.5
744	PREVENTER	91	92	2	Female	38.7	normal	0	0	0	0	NO	0	7.901	NA	0.167674	74.748	15.0616	1.06383	0.783875	7.67077	0.671892	NO	NO	NO	NO	NO	NO	NO	NO	NO	4.96	9.33	46.62	12.8	49.87	22644	229.14	1.35	736.78	670.57	1292	11.073	150	13.29	301.18	293.04	1.95	52.5
4299	PREVENTER	91	92	nursery	Female	39.1	normal	0	0	1.5	1.5	NO	2.4	7.852	95.1	0.247317	84.8086	8.77193	0.637959	0.358852	5.14354	0.279107	NO	NO	NO	YES	NO	YES	NO	NO	NO	4.53	1.13	6.71	12.8	4.04	2583	216.21	17.45	2249	1769	1177	11.073	150	13.29	301.18	293.04	1.95	52.5
8076	PREVENTER	91	92	2	Female	38.8	normal	0	0	1	0	NO	0.48	7.629	146.3	0.243547	68.2453	20.6814	0.715503	0.545145	8.68825	1.12436	NO	NO	NO	NO	NO	NO	NO	NO	NO	6.75	0.78	1.54	12.8	4.04	13633	50.84	0.99	83.27	577.91	480.19	11.073	150	13.29	301.18	293.04	1.95	52.5
929	PREVENTER	30	31	3	Female	38.7	normal	0	0	0	0	NO	0	7.525	121.7	0.223796	71.9366	15.9258	0.811751	1.00503	9.00657	1.31426	NO	NO	NO	NO	NO	NO	NO	YES	NO	15.55	3.12	6.71	12.8	57.87	148548	61.92	2.36	2358	463.76	735.09	6.293	110	7.6	149.11	169.26	1.43	38.5
4365	PREVENTER	30	31	2	Female	38.9	normal	0	0	0	0	NO	0	7.958	107.1	0.2642	69.5529	19.7303	1.59688	1.56139	6.31654	1.24202	NO	NO	NO	YES	NO	NO	NO	YES	NO	4.53	3.88	6.71	12.8	4.04	58044	85.51	2.28	442.92	525.02	190.88	6.293	110	7.6	149.11	169.26	1.43	38.5
8480	PREVENTER	30	31	2	Female	38.6	normal	0	0	0	0	NO	0	7.454	159.8	0.441522	71.7188	18.0324	0.456517	0.342388	9.22164	0.228258	YES	NO	NO	NO	NO	NO	NO	YES	NO	19.38	2.89	3.3	12.8	4.04	11708	95.68	1.49	1135	732.85	175.57	6.293	110	7.6	149.11	169.26	1.43	38.5
3220	PREVENTER	58	59	nursery	Female	39	normal	0	0	1.5	2	NO	2.64	7.85	124.7	0.19862	67.4863	19.3078	0.956284	0.819672	10.1093	1.32058	NO	NO	NO	NO	NO	YES	NO	NO	NO	8.96	21.89	6.71	12.8	16.25	27733	138.78	5.39	3420	881.61	202.77	8.878	150	10.66	220.15	214.2	1.95	52.5
7396	PREVENTER	58	59	1	Female	39.2	normal	0	1	1	1	NO	2.64	7.66	100.1	0.254382	67.678	17.3948	1.21359	1.25405	11.2055	1.25405	NO	NO	NO	NO	NO	NO	NO	NO	NO	6.9	0.65	6.71	12.8	4.04	148548	115.27	0.33	1688	746.98	225.79	8.878	150	10.66	220.15	214.2	1.95	52.5
929	PREVENTER	91	92	3	Female	38.5	normal	0	0	1	0	NO	0.48	7.626	128.1	0.299084	69.4201	21.0236	0.777454	0.58309	7.74214	0.453515	NO	NO	NO	NO	NO	NO	NO	NO	NO	2.95	0.54	8.75	12.8	63.2	36892	77.62	0.91	384.38	501.56	1161	11.073	150	13.29	301.18	293.04	1.95	52.5
4365	PREVENTER	91	92	2	Female	38.9	normal	0	0	1	0	YES	0.48	NA	NA	NA	NA	NA	NA	NA	NA	NA	NO	NO	NO	YES	NO	NO	NO	NO	NO	6.31	3.13	6.71	25.55	99.05	148548	104.22	1.28	278.85	693.77	4388	11.073	150	13.29	301.18	293.04	1.95	52.5
8480	PREVENTER	91	92	2	Female	39.1	normal	0	0	0	0	NO	0.96	7.236	119	0.313469	71.5256	17.6332	0.679206	0.574713	8.33333	1.25392	YES	NO	NO	NO	NO	NO	NO	NO	NO	5.54	0.46	0.18	12.8	15.2	76126	71.64	0.91	657.81	585.26	142.95	11.073	150	13.29	301.18	293.04	1.95	52.5
1139	PREVENTER	30	31	3	Female	38.7	normal	0	0	1	1	NO	0.96	6.665	136.8	0.321748	63.427	19.2923	0.70286	0.605914	14.6631	1.30877	NO	NO	NO	NO	NO	NO	NO	YES	NO	22.46	0.46	6.71	12.8	4.04	6380	98.86	1.92	1017	511.54	281.93	6.293	110	7.6	149.11	169.26	1.43	38.5
6061	PREVENTER	30	31	1	Female	38.7	normal	0	0	0	0	NO	0	8.476	108.8	0.194521	63.8081	20.5911	2.66473	3.19767	7.17054	2.56783	NO	NO	NO	NO	NO	NO	NO	YES	NO	37.84	4.15	25.62	12.8	7.82	2946	58.99	2.21	1067	638.62	3848	6.293	110	7.6	149.11	169.26	1.43	38.5
9729	PREVENTER	30	31	1	Female	38.9	normal	0	0	0	0	YES	0	7.765	115.9	0.260879	75.4407	15.0641	1.12179	1.16186	6.29006	0.921474	NO	NO	NO	NO	NO	NO	NO	YES	NO	24.24	2.16	6.91	12.8	11.18	8.53	75.23	1.63	3420	682.18	1296	6.293	110	7.6	149.11	169.26	1.43	38.5
3291	PREVENTER	58	59	1	Female	38.1	normal	0	1	1	1	NO	1.68	7.915	91.1	NA	NA	NA	NA	NA	NA	NA	NO	NO	NO	NO	NO	NO	NO	NO	NO	6.23	1.53	6.71	12.8	4.04	12135	75.5	2.21	889.28	662.1	106.61	8.878	150	10.66	220.15	214.2	1.95	52.5
7741	PREVENTER	58	59	1	Female	39	normal	0	1	1	1.5	YES	2.88	7.969	110.3	NA	NA	NA	NA	NA	NA	NA	YES	NO	NO	NO	NO	NO	NO	NO	NO	0.07	0.46	6.71	12.8	9.81	148548	97.7	1.28	1559	685.9	133.47	8.878	150	10.66	220.15	214.2	1.95	52.5
1139	PREVENTER	91	92	3	Female	38.7	normal	0	0	0	0	NO	0	8.174	113.1	0.317163	71.8935	17.7515	1.11769	1.08481	6.34451	1.80802	NO	NO	NO	NO	NO	NO	NO	NO	NO	22.79	6.44	6.71	12.8	29.89	74510	162.17	0.41	2541	962.1	169.77	11.073	150	13.29	301.18	293.04	1.95	52.5
6061	PREVENTER	91	92	1	Female	39.1	normal	0	0	0	0	NO	0.96	8.465	94.8	0.179571	72.4808	15.7336	1.76783	1.59104	6.59988	1.82675	NO	NO	NO	NO	NO	NO	NO	NO	NO	12.04	0.46	6.71	12.8	4.04	16919	48.56	1.71	627.93	659.74	204.7	11.073	150	13.29	301.18	293.04	1.95	52.5
9729	PREVENTER	91	92	1	Female	39.1	normal	2	0	0	0	NO	1.92	7.779	145.9	0.363127	76.3336	14.8118	0.595722	0.487409	7.06742	0.704035	NO	NO	NO	NO	NO	NO	NO	NO	NO	7.22	30.74	6.91	12.8	89.93	148548	198.08	2.79	1098	598.19	16330	11.073	150	13.29	301.18	293.04	1.95	52.5
1654	PREVENTER	30	31	1	Female	39.5	normal	0	0	0	0	NO	0.96	7.916	151.9	0.233357	68.8006	19.5216	1.82905	1.93458	6.54238	1.37179	NO	NO	NO	NO	NO	NO	NO	YES	NO	.	.	.	.	.	.	.	.	.	.	.	6.293	110	7.6	149.11	169.26	1.43	38.5
6063	PREVENTER	30	31	1	Female	39	normal	0	0	0	0	NO	0.96	6.72	116	0.231524	64.8532	21.3563	0.531377	0.480769	11.9433	0.83502	NO	NO	NO	NO	NO	NO	NO	YES	NO	28.4	8.7	7.66	12.8	4.04	5343	67.72	4.83	2617	662.86	339.77	6.293	110	7.6	149.11	169.26	1.43	38.5
258	PREVENTER	58	59	3	Female	39	normal	0	0	0	0	NO	0.96	7.56	143.6	0.28956	74.6395	16.596	0.876449	0.904722	5.79587	1.18745	NO	NO	NO	NO	NO	NO	NO	NO	NO	6.84	2.6	6.71	12.8	4.04	4163	68.15	0.33	851.3	687.39	120.06	8.878	150	10.66	220.15	214.2	1.95	52.5
3559	PREVENTER	58	59	2	Female	38.8	normal	0	0	1.5	1	NO	1.2	7.871	134.2	0.237629	69.8364	19.5637	0.715746	0.681663	7.4983	1.70416	NO	NO	NO	NO	NO	NO	NO	NO	NO	5.43	5.14	6.71	12.8	4.04	18830	75.99	3.7	2062	632.84	84.95	8.878	150	10.66	220.15	214.2	1.95	52.5
7911	PREVENTER	58	59	nursery	Female	38.1	normal	0	1	2.5	2	NO	2.88	7.449	95.2	0.171976	64.7529	17.4738	1.3979	1.3979	13.7793	1.1982	NO	YES	YES	NO	NO	NO	NO	NO	NO	.	.	.	.	.	.	.	.	.	.	.	8.878	150	10.66	220.15	214.2	1.95	52.5
1654	PREVENTER	91	92	2	Female	39.2	normal	0	0	1	1	NO	1.92	7.865	NA	0.31788	71.7562	17.1696	1.35788	1.65963	6.42728	1.62945	NO	NO	NO	NO	NO	NO	NO	NO	NO	.	.	.	.	.	.	.	.	.	.	.	11.073	150	13.29	301.18	293.04	1.95	52.5
6063	PREVENTER	91	92	1	Female	38.8	normal	0	0	0	0	NO	0	7.798	121.1	0.21208	69.8702	16.8713	0.666433	0.526131	11.1891	0.876885	NO	NO	NO	NO	NO	NO	NO	NO	NO	3.81	3.13	6.71	12.8	4.04	4212	86.78	1.28	860.66	713.14	274.4	11.073	150	13.29	301.18	293.04	1.95	52.5
2734	PREVENTER	30	31	2	Female	39	normal	0	0	0	0	NO	0.96	7.242	136	0.302822	71.8809	18.3762	0.541272	0.405954	8.14614	0.649526	NO	NO	NO	NO	NO	NO	NO	YES	NO	7.02	0.46	6.71	12.8	4.04	25479	106.2	1.13	1162	490.95	591.53	6.293	110	7.6	149.11	169.26	1.43	38.5
7291	PREVENTER	30	31	1	Female	39.4	normal	0	0	0.5	0.5	NO	1.44	7.92	112.4	NA	NA	NA	NA	NA	NA	NA	NO	NO	NO	NO	NO	NO	NO	YES	NO	8.45	12.16	24.67	12.8	11.18	4579	107.36	1.35	2317	595.62	1154	6.293	110	7.6	149.11	169.26	1.43	38.5
596	PREVENTER	58	59	2	Female	38.7	normal	0	0	0	0	YES	0	7.718	109.3	NA	NA	NA	NA	NA	NA	NA	NO	NO	NO	NO	NO	NO	NO	NO	NO	.	.	.	.	.	.	.	.	.	.	.	8.878	150	10.66	220.15	214.2	1.95	52.5
7946	PREVENTER	58	59	2	Female	38.8	normal	0	0	1	0	NO	0.48	8.175	76	0.255189	74.6773	16.8156	1.12546	1.09235	5.19695	1.09235	NO	NO	NO	NO	NO	NO	NO	NO	NO	11.55	0.46	6.71	12.8	61.28	148548	83.8	3.14	2638	825.86	142.51	8.878	150	10.66	220.15	214.2	1.95	52.5
2734	PREVENTER	91	92	2	Female	38.8	normal	0	0	0	0	NO	0	7.286	137.6	0.215962	68.846	19.3283	0.535906	0.428725	10.0393	0.821722	NO	NO	NO	NO	NO	NO	NO	NO	NO	2.78	63.5	6.71	12.8	112.4	3668	87.78	0.33	194.3	983.39	82.95	11.073	150	13.29	301.18	293.04	1.95	52.5
7291	PREVENTER	91	92	1	Female	38.9	normal	0	0	0	0	NO	0	7.362	123.5	0.193102	69.0853	17.1944	0.967458	0.659631	11.1258	0.967458	NO	NO	NO	NO	NO	NO	NO	NO	NO	7.75	26.9	6.91	12.8	52.54	2840	46.82	1.06	822.63	868.72	1819	11.073	150	13.29	301.18	293.04	1.95	52.5
2752	PREVENTER	30	31	2	Female	39.2	normal	0	0	1	1	NO	1.92	7.495	124.8	0.368166	74.375	18.05	0.575	0.4	5.725	0.875	NO	NO	NO	NO	NO	NO	NO	YES	NO	6.75	1.26	6.71	12.8	23.22	16479	106.3	0.33	2159	794.14	229.7	6.293	110	7.6	149.11	169.26	1.43	38.5
7320	PREVENTER	30	31	2	Female	39	normal	0	0	0	0	NO	0.96	7.623	122.1	0.235547	70.3081	16.8868	2.04082	2.32093	7.0028	1.44058	YES	NO	NO	NO	NO	YES	NO	YES	NO	37.12	0.46	6.71	12.8	4.04	21908	85.08	1.57	3420	620.07	196.8	6.293	110	7.6	149.11	169.26	1.43	38.5
3991	PREVENTER	91	92	2	Female	39.1	normal	0	0	1	1	NO	1.92	7.265	145.1	0.266957	68.9887	17.8218	0.49505	0.459689	10.9972	1.23762	NO	NO	NO	NO	YES	NO	NO	NO	NO	.	.	.	.	.	.	.	.	.	.	.	11.073	150	13.29	301.18	293.04	1.95	52.5
7984	PREVENTER	58	59	2	Female	38.7	normal	0	0	0	0	NO	0	8.115	85	0.262763	72.1573	18.3139	0.53135	0.354233	7.79313	0.850159	YES	NO	NO	NO	NO	NO	NO	NO	NO	.	.	.	.	.	.	.	.	.	.	.	8.878	150	10.66	220.15	214.2	1.95	52.5
2752	PREVENTER	91	92	2	Female	38.5	normal	0	0	0	1	NO	0.48	7.68	97.7	0.261167	75.6834	16.1475	0.731087	0.635728	5.91227	0.890019	NO	NO	NO	NO	NO	NO	NO	NO	NO	3.18	1.76	6.71	12.8	4.04	144565	58.85	1.63	702.97	759.09	72.31	11.073	150	13.29	301.18	293.04	1.95	52.5
7320	PREVENTER	91	92	2	Female	39.2	normal	0	0	1.5	0	YES	1.68	NA	NA	NA	NA	NA	NA	NA	NA	NA	YES	NO	NO	NO	NO	YES	NO	NO	NO	4.84	0.56	6.71	12.8	15.2	74173	81.25	1.06	2606	696.71	128.83	11.073	150	13.29	301.18	293.04	1.95	52.5
3220	PREVENTER	16	17	2	Female	39.1	normal	0	0	0	0	YES	0.96	7.115	142	0.379508	50.3851	32.85	0	0.0906208	16.2211	0.453104	NO	NO	NO	NO	NO	YES	YES	YES	YES	11.27	2.75	6.71	12.8	90.61	5468	140.19	1.28	1952	624.35	3785	4.647	30	5.47	107.485	122.01	0.39	10.5
3054	PREVENTER	30	31	1	Female	38.6	normal	0	0	1	1	NO	0.96	7.82	174.9	0.19219	69.7899	18.2773	1.34454	1.42857	8.78151	0.378151	NO	NO	NO	NO	NO	NO	NO	YES	NO	5.94	0.46	6.71	12.8	4.04	148548	144.45	1.86	854.36	594.98	400.7	6.293	110	7.6	149.11	169.26	1.43	38.5
7327	PREVENTER	30	31	1	Female	38.4	normal	0	0	0.5	0.5	NO	0.48	8.099	NA	0.287688	60.2384	20.599	3.02567	3.60636	10.2384	2.29218	NO	NO	NO	NO	NO	NO	NO	YES	NO	38.89	3.08	6.71	12.8	7.14	44446	107.89	3.22	1980	799.87	548.41	6.293	110	7.6	149.11	169.26	1.43	38.5
744	PREVENTER	58	59	2	Female	39.6	normal	0	0	0	0	YES	0.96	7.777	89.6	NA	NA	NA	NA	NA	NA	NA	NO	NO	NO	NO	NO	NO	NO	NO	NO	7.86	7.52	6.71	12.8	24.55	9563	86.12	4.22	638.5	475.6	58.51	8.878	150	10.66	220.15	214.2	1.95	52.5
4299	PREVENTER	58	59	3	Female	39	normal	0	0	2.5	2	NO	3.12	8.003	NA	NA	NA	NA	NA	NA	NA	NA	NO	NO	NO	YES	NO	YES	NO	NO	NO	7.12	2.33	6.71	12.8	105.74	723.52	188.41	23.8	2620	1323	1708	8.878	150	10.66	220.15	214.2	1.95	52.5
8076	PREVENTER	58	59	2	Female	39	normal	0	0.5	0	0	NO	1.32	7.808	95.7	0.358054	72.5056	16.1435	0.588565	0.588565	9.13677	1.037	NO	NO	NO	NO	NO	NO	NO	NO	NO	9.03	0.46	0.18	12.8	4.04	83392	62.72	3.65	2256	592.52	59.85	8.878	150	10.66	220.15	214.2	1.95	52.5
3054	PREVENTER	91	92	2	Female	38.9	normal	0	0	0	0.5	NO	0.24	7.343	NA	0.3349	65.1404	20.1537	0.668449	0.467914	11.5976	1.97193	NO	NO	NO	NO	NO	NO	NO	NO	NO	11.83	7.83	6.71	12.8	7.54	148548	117.25	0.33	1352	687.39	90.53	11.073	150	13.29	301.18	293.04	1.95	52.5
7327	PREVENTER	91	92	1	Female	38.8	normal	0	0	1	0	YES	0.48	7.374	126.4	2.71638	70.347	17.224	1.13565	0.883281	9.02208	1.38801	NO	NO	NO	NO	NO	NO	NO	NO	NO	8.51	1.6	6.71	12.8	8.49	10107	64.05	1.63	416.18	479.29	119.76	11.073	150	13.29	301.18	293.04	1.95	52.5
7320	PREVENTER	16	17	2	Female	38.7	normal	0	0	0.5	0.5	NO	0.48	NA	NA	0.169737	60	24.5714	2.80519	2.85714	8.05195	1.71429	YES	NO	NO	NO	NO	YES	YES	YES	YES	8.08	0.46	6.71	12.8	4.04	31826	104.08	5.04	3249	868.54	422.55	4.647	30	5.47	107.485	122.01	0.39	10.5
3220	PREVENTER	30	31	2	Female	39.1	normal	0	0	0	0	NO	0.96	NA	NA	NA	NA	NA	NA	NA	NA	NA	NO	NO	NO	NO	NO	YES	NO	YES	NO	12.52	3.21	6.71	12.8	45.13	17257	78.12	6.64	3420	666.91	513.01	6.293	110	7.6	149.11	169.26	1.43	38.5
7396	PREVENTER	30	31	1	Female	39.3	normal	0	0	0	0	NO	0.96	7.582	120.2	0.251665	70.5626	16.2669	0.566943	0.305277	11.6005	0.697776	NO	NO	NO	NO	NO	NO	NO	YES	NO	17.93	0.46	6.71	12.8	12.01	9828	88.63	1.5	1880	727.86	284.96	6.293	110	7.6	149.11	169.26	1.43	38.5
929	PREVENTER	58	59	3	Female	38.6	normal	0	0	0	0	NO	0	7.755	85.5	0.258653	68.6881	19.5402	0.792707	0.713436	8.79905	1.46651	NO	NO	NO	NO	NO	NO	NO	NO	NO	4.81	2.06	6.71	12.8	56.54	148548	37.02	1.63	743.64	481.74	89.77	8.878	150	10.66	220.15	214.2	1.95	52.5
4365	PREVENTER	58	59	2	Female	38.6	normal	0	0	0	1.5	NO	0.72	8.37	119	0.22249	74.0756	15.5882	1.80672	1.93277	5.54622	1.05042	NO	NO	NO	YES	NO	NO	NO	NO	NO	30.97	0.46	6.71	12.8	9.81	148548	39.7	1.06	420.16	572.44	106.02	8.878	150	10.66	220.15	214.2	1.95	52.5
8480	PREVENTER	58	59	2	Female	39.5	normal	0	0	1.5	0.5	NO	1.92	7.162	159.3	0.394662	66.3866	22.5578	0.866597	0.735294	7.53676	1.91702	YES	NO	NO	NO	NO	NO	NO	NO	NO	23.24	0.92	0.18	12.8	31.22	18767	92.5	9.52	2256	493.83	71.66	8.878	150	10.66	220.15	214.2	1.95	52.5
7396	PREVENTER	91	92	1	Female	39.2	normal	0	0	0	1	YES	1.44	7.254	185.8	0.339304	66.8552	19.4432	1.00043	0.826446	10.3523	1.5224	NO	NO	NO	NO	NO	NO	NO	NO	NO	10.33	27.69	7.66	12.8	125.61	148548	389.07	0.33	757.7	858.65	15718	11.073	150	13.29	301.18	293.04	1.95	52.5
7946	PREVENTER	16	17	1	Female	38.8	normal	0	0	0	0	YES	0	8.575	96.1	NA	NA	NA	NA	NA	NA	NA	NO	NO	NO	NO	NO	NO	YES	YES	YES	10.27	5.61	6.71	12.8	35.87	65668	126.31	1.71	3176	838.16	215.14	4.647	30	5.47	107.485	122.01	0.39	10.5
3291	PREVENTER	30	31	1	Female	39	normal	0	0	0	0	YES	0.96	7.443	62.1	0.227152	75.6318	15.2773	0.754432	0.490381	7.09166	0.754432	NO	NO	NO	NO	NO	NO	NO	YES	NO	6.67	1.83	6.71	12.8	4.04	39024	97.27	1.78	2751	606.85	507.63	6.293	110	7.6	149.11	169.26	1.43	38.5
7741	PREVENTER	30	31	1	Female	39.8	normal	0	0	0.5	0.5	NO	1.44	NA	NA	0.248484	67.7973	19.7925	1.43655	1.67598	7.86113	1.43655	YES	NO	NO	NO	NO	NO	NO	YES	NO	0.07	0.46	6.71	12.8	10.91	148548	77.55	1.93	1022	503.78	256.92	6.293	110	7.6	149.11	169.26	1.43	38.5
1139	PREVENTER	58	59	3	Female	38.9	normal	0	0	1.5	1	YES	1.2	NA	NA	NA	NA	NA	NA	NA	NA	NA	NO	NO	NO	NO	NO	NO	NO	NO	NO	5.25	5.3	6.71	12.8	9.84	8492	100.99	2.36	851.17	495.62	143.93	8.878	150	10.66	220.15	214.2	1.95	52.5
6061	PREVENTER	58	59	1	Female	39	normal	0	1	2	1	YES	3.12	8.289	123.8	NA	NA	NA	NA	NA	NA	NA	NO	NO	NO	NO	NO	NO	NO	NO	NO	26.1	0.61	6.71	12.8	21.89	12813	62.99	3.22	749.01	565.68	89.42	8.878	150	10.66	220.15	214.2	1.95	52.5
9729	PREVENTER	58	59	1	Female	39.6	normal	0	0	0	0	YES	0.96	7.573	115.6	NA	NA	NA	NA	NA	NA	NA	NO	NO	NO	NO	NO	NO	NO	NO	NO	11.86	0.46	6.71	12.8	26.31	148548	35.05	12.08	818.02	615.77	45.05	8.878	150	10.66	220.15	214.2	1.95	52.5
3291	PREVENTER	91	92	1	Female	39.1	normal	0	0	0	0.5	YES	1.2	8.136	113.2	0.397695	73.8248	15.5225	0.743997	0.541089	8.28542	1.08218	NO	NO	NO	NO	NO	NO	NO	NO	NO	5.25	13.54	12.45	12.8	28.56	10507	257.18	2.72	699.85	735.03	3438	11.073	150	13.29	301.18	293.04	1.95	52.5
7741	PREVENTER	91	92	1	Female	38.9	normal	0	0	0	0	NO	0	7.626	110	0.18194	71.2687	18.9232	1.22601	1.01279	7.40938	0.159915	YES	NO	NO	NO	NO	NO	NO	NO	NO	0.09	0.46	28.01	12.8	20.35	4373	93.59	1.42	1087	586.61	881.38	11.073	150	13.29	301.18	293.04	1.95	52.5
3220	PREVENTER	91	92	2	Female	39.1	normal	0	0	1	0.5	NO	1.68	7.36	159.8	0.345197	67.8503	20.8413	0.573614	0.382409	8.98662	1.36575	NO	NO	NO	NO	NO	YES	NO	NO	NO	4.31	18.12	10.21	12.8	128.89	4112	176.29	0.33	2338	794.69	5547	11.073	150	13.29	301.18	293.04	1.95	52.5
258	PREVENTER	117	118	3	Female	38.6	normal	0	0	0.5	0	YES	0.24	NA	NA	NA	NA	NA	NA	NA	NA	NA	NO	NO	NO	NO	NO	NO	NO	NO	NO	12.21	1.79	6.71	12.8	26.31	50094	3.42	0.33	573.63	484.43	107.73	12.94	150	15.19	373.515	363.42	1.95	52.5
3559	PREVENTER	117	118	2	Female	40.1	normal	0	0	0	0	YES	3.84	NA	NA	NA	NA	NA	NA	NA	NA	NA	NO	NO	NO	NO	NO	NO	NO	NO	NO	6.68	21.15	6.71	12.8	82.1	2941	195.42	0.33	148.06	725.03	274.68	12.94	150	15.19	373.515	363.42	1.95	52.5
1654	PREVENTER	147	148	2	Female	38.8	normal	0	0	0	0	NO	0	7.414	71	0.293198	67.8711	18.7826	0.78125	1.07422	10.2214	1.26953	NO	NO	NO	NO	NO	NO	NO	NO	NO	.	.	.	.	.	.	.	.	.	.	.	14.648	150	16.55	442.705	430.74	1.95	52.5
6063	PREVENTER	147	148	1	Female	39.1	normal	0	0	0	0	NO	0.96	7.792	57.8	NA	NA	NA	NA	NA	NA	NA	NO	NO	NO	NO	NO	NO	NO	NO	NO	.	.	.	.	.	.	.	.	.	.	.	14.648	150	16.55	442.705	430.74	1.95	52.5
645	PREVENTER	1	2	1	Female	39.3	redness	1	0	0	0	YES	1.92	7.283	148.6	NA	NA	NA	NA	NA	NA	NA	YES	NO	NO	YES	YES	YES	NO	NO	NO	4.87	7.62	6.71	12.8	7.54	148548	93.31	13.92	2724	665.9	143.49	0	0	0.1	0	0	0	0
9729	PREVENTER	1	2	1	Female	39	normal	0	1	0.5	0.5	YES	2.16	8.044	134.5	NA	NA	NA	NA	NA	NA	NA	NO	NO	NO	NO	NO	NO	NO	NO	NO	28.05	0.61	0.18	33.86	20.55	60133	38.37	2.36	3403	891.18	230.79	0	0	0.1	0	0	0	0
1654	PREVENTER	16	17	1	Female	NA	normal	0	0	0	0	NO	0	7.572	126	0.254391	66.7473	14.9326	1.10612	1.86657	14.8289	0.518493	NO	NO	NO	NO	NO	NO	YES	YES	YES	.	.	.	.	.	.	.	.	.	.	.	4.647	30	5.47	107.485	122.01	0.39	10.5
596	PREVENTER	117	85	2	Female	38.9	normal	0	0	0	0	YES	0	7.243	139.9	0.748076	73.3085	12.813	0.45285	0.266383	12.6532	0.506127	NO	NO	NO	NO	NO	NO	NO	NO	NO	.	.	.	.	.	.	.	.	.	.	.	12.94	150	15.19	373.515	363.42	1.95	52.5
7946	PREVENTER	117	118	2	Female	38.8	normal	0	0	0	0	NO	0	6.961	164.2	0.208025	65.1724	21.9363	0.450928	0.424403	11.2467	0.769231	NO	NO	NO	NO	NO	NO	NO	NO	NO	1.64	0.46	6.71	12.8	26.31	2446	165.04	0.33	193.04	414.89	300.68	12.94	150	15.19	373.515	363.42	1.95	52.5
2734	PREVENTER	147	148	2	Female	38.3	normal	0	0	0	0	NO	0	7.232	-101.5	0.268213	67.5758	20.3939	0.636364	0.818182	9.51515	1.06061	NO	NO	NO	NO	NO	NO	NO	NO	NO	.	.	.	.	.	.	.	.	.	.	.	14.648	150	16.55	442.705	430.74	1.95	52.5
7291	PREVENTER	147	148	1	Female	38.8	normal	0	0	0	0	NO	0	6.906	121.4	0.18013	69.5493	12.631	0.786164	0.838574	15.1468	1.04822	NO	NO	NO	NO	NO	NO	NO	NO	NO	7.83	5.05	6.71	12.8	24.55	5472	110.81	0.33	1828	531.02	302.64	14.648	150	16.55	442.705	430.74	1.95	52.5
744	PREVENTER	1	2	2	Female	39	normal	0	0	0	0	NO	0.96	7.49	135.2	0.18342	61.6999	21.7614	2.81618	4.04506	8.29493	1.38249	NO	NO	NO	NO	NO	NO	NO	NO	NO	3.18	15.32	6.71	88.29	9.16	3065	94.35	1.2	1052	773.84	63	0	0	0.1	0	0	0	0
258	PREVENTER	9	10	3	Female	37.5	normal	0	0	0	0	NO	0	7.639	151.2	0.205789	58.3594	26.8629	2.66124	3.35003	8.57858	0.187852	NO	NO	NO	NO	NO	NO	YES	YES	NO	5.28	3.17	6.71	12.8	32.09	3378	47.95	1.13	722.3	631.26	207.6	4.11	0	4.31	91.02	103.32	0	0
2734	PREVENTER	16	17	2	Female	39	normal	0	0.5	0.5	0.5	NO	1.8	8.017	103.2	0.234788	70.1068	19.6916	1.38395	1.02807	6.88019	0.90945	NO	NO	NO	NO	NO	NO	YES	YES	YES	15.66	2.06	6.71	12.8	12.01	11099	62.73	4.83	1513	811.26	119.2	4.647	30	5.47	107.485	122.01	0.39	10.5
7984	PREVENTER	117	118	2	Female	39.1	normal	0	0	0	0	NO	0.96	7.984	NA	0.282833	68.9274	18.5772	1.17951	1.10579	10.0627	0.147438	YES	NO	NO	NO	NO	NO	NO	NO	NO	.	.	.	.	.	.	.	.	.	.	.	12.94	150	15.19	373.515	363.42	1.95	52.5
2752	PREVENTER	147	148	2	Female	39.1	normal	0	0	0	0	NO	0.96	7.843	111.3	0.191523	75.7533	14.9247	0.988701	1.17702	5.88512	1.27119	NO	NO	NO	NO	NO	NO	NO	NO	NO	2.83	4.89	135.83	107.65	24.55	10865	525.49	2.64	1211	499.79	9245	14.648	150	16.55	442.705	430.74	1.95	52.5
7320	PREVENTER	147	148	2	Female	39.1	normal	0	0	0	0	NO	0.96	7.609	82	0.280291	69.6915	17.4955	0.689655	0.61706	10.49	1.01633	YES	NO	NO	NO	NO	YES	NO	NO	NO	.	.	.	.	.	.	.	.	.	.	.	14.648	150	16.55	442.705	430.74	1.95	52.5
1139	PREVENTER	1	2	2	Female	38.9	normal	0	0	0	0	NO	0	6.644	148.3	0.39325	46.799	26.681	3.64807	5.40057	17.1137	0.357654	NO	NO	NO	NO	NO	NO	NO	NO	NO	43.32	0.46	6.71	12.8	15.2	46657	212.5	1.92	3420	853.25	206.42	0	0	0.1	0	0	0	0
2752	PREVENTER	9	10	2	Female	38.7	normal	0	0	0	0	NO	0	8.316	124	NA	NA	NA	NA	NA	NA	NA	NO	NO	NO	NO	NO	NO	YES	YES	NO	9.92	6.57	6.71	12.8	31.22	148548	79.22	2.21	2250	959.23	172.9	4.11	0	4.31	91.02	103.32	0	0
2752	PREVENTER	16	17	2	Female	39.1	normal	0	0	0	0	YES	0.96	7.766	120.6	0.260359	74.5394	18.753	0.519603	0.330657	5.76287	0.0944733	NO	NO	NO	NO	NO	NO	YES	YES	YES	12.16	1.8	6.71	12.8	33.88	148548	114.26	0.62	2291	988.39	143.76	4.647	30	5.47	107.485	122.01	0.39	10.5
744	PREVENTER	117	118	2	Female	38.6	normal	0	0	0	0	YES	0	8.146	108	NA	NA	NA	NA	NA	NA	NA	NO	NO	NO	NO	NO	NO	NO	NO	NO	3.26	3.83	8.75	12.8	15.2	26361	44.28	0.91	395.63	412.4	76.73	12.94	150	15.19	373.515	363.42	1.95	52.5
8076	PREVENTER	117	118	2	Female	38.8	normal	0	0	0	0	YES	0	7.506	132.8	0.405982	68.1145	21.7845	0.40404	0.23569	8.24916	1.21212	NO	NO	NO	NO	NO	NO	NO	NO	NO	6.7	4.09	0.18	12.8	4.04	3703	37.02	0.7	170.75	300.8	33.28	12.94	150	15.19	373.515	363.42	1.95	52.5
3054	PREVENTER	147	148	2	Female	38.8	normal	0	0	0	0	NO	0	8.181	57.5	0.240044	71.4545	15.2364	1.05455	1.45455	9.78182	1.01818	NO	NO	NO	NO	NO	NO	NO	NO	NO	.	.	.	.	.	.	.	.	.	.	.	14.648	150	16.55	442.705	430.74	1.95	52.5
7327	PREVENTER	147	148	1	Female	39	normal	0	0	0	0	YES	0.96	6.567	88.6	0.510104	59.5051	24.5219	0.534308	0.618673	13.2171	1.60292	NO	NO	NO	NO	NO	NO	NO	NO	NO	6.81	1.06	6.71	54.73	15.2	52575	121.96	2.14	851.17	381.12	126.52	14.648	150	16.55	442.705	430.74	1.95	52.5
2752	PREVENTER	1	2	2	Female	39	normal	0	0	0	0	NO	0.96	6.646	122.2	0.186979	72.6961	15.988	2.14316	3.08616	4.58637	1.50021	NO	NO	NO	NO	NO	NO	NO	NO	NO	13.58	2.69	6.71	12.8	19.21	27749	105.5	1.35	2103	662.58	161.31	0	0	0.1	0	0	0	0
3054	PREVENTER	9	10	1	Female	38.6	normal	0	0	0	0	YES	0	6.616	198.7	0.212968	82.4849	15.2718	0	0.258844	1.98447	0	NO	NO	NO	NO	NO	NO	YES	YES	NO	21.88	3.58	289.03	12.8	4.04	148548	482.57	3.21	3069	807.79	4858	4.11	0	4.31	91.02	103.32	0	0
3054	PREVENTER	16	17	1	Female	38.4	normal	0	0	0	0	YES	0	NA	NA	NA	NA	NA	NA	NA	NA	NA	NO	NO	NO	NO	NO	NO	YES	YES	YES	4.47	17.31	6.71	12.8	4.04	148548	206.02	7.06	2670	1196	152.81	4.647	30	5.47	107.485	122.01	0.39	10.5
929	PREVENTER	117	118	3	Female	39	normal	0	0	0	0	NO	0.96	8.133	NA	0.24833	71.4341	18.5042	1.07941	0.925212	7.20894	0.848111	NO	NO	NO	NO	NO	NO	NO	NO	NO	0.97	2.16	6.71	77.87	23.22	69139	61.92	0.48	680.53	430.72	171.66	12.94	150	15.19	373.515	363.42	1.95	52.5
4365	PREVENTER	117	118	2	Female	38.6	normal	0	0	0	0	NO	0	7.658	98.9	0.232008	68.2187	17.3926	0.871132	0.871132	11.8354	0.811054	NO	NO	NO	YES	NO	NO	NO	NO	NO	.	.	.	.	.	.	.	.	.	.	.	12.94	150	15.19	373.515	363.42	1.95	52.5
8480	PREVENTER	117	118	2	Female	38.8	normal	0	0	0	0	NO	0	7.544	144.8	0.27513	66.9176	19.0216	0.650017	0.513171	11.974	0.923709	YES	NO	NO	NO	NO	NO	NO	NO	NO	4.09	1.43	0.18	17.82	16.54	6962	45.62	1.35	278.47	406.85	95.36	12.94	150	15.19	373.515	363.42	1.95	52.5
3220	PREVENTER	147	148	2	Female	38.5	normal	0	0	0	0	NO	0	6.753	47.7	0.242406	64.9861	18.3588	0.764951	0.938804	14.0125	0.938804	NO	NO	NO	NO	NO	YES	NO	NO	NO	.	.	.	.	.	.	.	.	.	.	.	14.648	150	16.55	442.705	430.74	1.95	52.5
7396	PREVENTER	147	148	1	Female	39.1	normal	0	0	0	0	YES	0.96	7.671	10.7	0.31973	71.4053	16.8635	0.692464	0.855397	9.3279	0.855397	NO	NO	NO	NO	NO	NO	NO	NO	NO	.	.	.	.	.	.	.	.	.	.	.	14.648	150	16.55	442.705	430.74	1.95	52.5
3054	PREVENTER	1	2	1	Female	39.4	redness	0	0	0	0	NO	1.44	7.572	419.9	0.0842377	61.0949	23.3577	3.13869	3.28467	8.75912	0.364964	NO	NO	NO	NO	NO	NO	NO	NO	NO	7.96	0.46	6.71	12.8	4.04	5023	87.78	2	139.71	717.44	289.72	0	0	0.1	0	0	0	0
3991	PREVENTER	16	17	2	Female	38.8	normal	0	0	0	0	NO	0	7.805	103.8	NA	NA	NA	NA	NA	NA	NA	NO	NO	NO	NO	YES	NO	YES	YES	YES	.	.	.	.	.	.	.	.	.	.	.	4.647	30	5.47	107.485	122.01	0.39	10.5
1139	PREVENTER	117	118	3	Female	39.3	normal	0	0	0	0	NO	0.96	7.904	133.6	0.257163	66.4582	19.5465	0.977326	0.820954	9.96873	2.2283	NO	NO	NO	NO	NO	NO	NO	NO	NO	4.04	4.31	6.71	12.8	4.04	15214	75.1	0.34	572.53	478.06	57.05	12.94	150	15.19	373.515	363.42	1.95	52.5
6061	PREVENTER	117	118	1	Female	38.7	normal	0	0	0	0	NO	0	8.761	53.2	NA	NA	NA	NA	NA	NA	NA	NO	NO	NO	NO	NO	NO	NO	NO	NO	8.74	1.46	6.71	12.8	16.54	85577	65.92	2	379.96	619.91	81.47	12.94	150	15.19	373.515	363.42	1.95	52.5
9729	PREVENTER	117	118	1	Female	39.1	normal	0	0	1	0.5	NO	1.68	7.535	123.5	0.339397	73.7432	14.8092	0.45427	0.333131	10.0545	0.605694	NO	NO	NO	NO	NO	NO	NO	NO	NO	4.06	78.34	0.18	12.8	20.55	79256	114.79	2.07	507.85	510.37	10175	12.94	150	15.19	373.515	363.42	1.95	52.5
3291	PREVENTER	147	148	1	Female	38.9	normal	0	0	0	0	NO	0	7.457	-110	0.319359	78.3274	12.8681	0.530035	0.530035	7.27326	0.471143	NO	NO	NO	NO	NO	NO	NO	NO	NO	0.75	6.51	6.71	49.57	4.04	19711	83.2	0.48	589.83	434.71	238.7	14.648	150	16.55	442.705	430.74	1.95	52.5
7741	PREVENTER	147	148	1	Female	39	normal	0	0	0	0	NO	0.96	7.748	102.9	0.3099	71.6833	17.4394	0.713267	0.927247	8.91583	0.32097	YES	NO	NO	NO	NO	NO	NO	NO	NO	.	.	.	.	.	.	.	.	.	.	.	14.648	150	16.55	442.705	430.74	1.95	52.5
3991	PREVENTER	9	10	2	Female	38.2	normal	0	0	0	0	NO	0	7.95	143.2	0.205531	67.0432	26.2458	0.697674	1.0299	4.75083	0.232558	NO	NO	NO	NO	YES	NO	YES	YES	NO	.	.	.	.	.	.	.	.	.	.	.	4.11	0	4.31	91.02	103.32	0	0
7911	PREVENTER	9	10	1	Female	38.8	normal	0	0	0	0	YES	0	7.303	183.2	0.492483	55.8372	43.0673	0.187793	0.125196	0.782473	0	NO	YES	YES	NO	NO	NO	YES	YES	NO	.	.	.	.	.	.	.	.	.	.	.	4.11	0	4.31	91.02	103.32	0	0
3291	PREVENTER	16	17	1	Female	38.3	normal	0	0	0	0	NO	0	8.351	157.5	0.178559	75.9057	13.3566	2.18245	2.1388	5.58708	0.829332	NO	NO	NO	NO	NO	NO	YES	YES	YES	9.27	3.96	6.71	12.8	8.49	63885	87.19	6.66	237.87	843.87	101.4	4.647	30	5.47	107.485	122.01	0.39	10.5
1654	PREVENTER	117	118	2	Female	39.2	normal	0	0	0	0	YES	0.96	NA	NA	NA	NA	NA	NA	NA	NA	NA	NO	NO	NO	NO	NO	NO	NO	NO	NO	.	.	.	.	.	.	.	.	.	.	.	12.94	150	15.19	373.515	363.42	1.95	52.5
6063	PREVENTER	117	118	1	Female	39.2	normal	0	0	0.5	0	YES	1.2	NA	NA	NA	NA	NA	NA	NA	NA	NA	NO	NO	NO	NO	NO	NO	NO	NO	NO	1.38	2.83	6.71	12.8	16.25	8978	69.3	0.33	934.91	570.15	65.1	12.94	150	15.19	373.515	363.42	1.95	52.5
258	PREVENTER	147	148	3	Female	39.1	normal	0	0	0	0	NO	0.96	7.39	46.4	0.290518	66.2925	19.6921	0.898012	1.09044	10.3271	1.69981	NO	NO	NO	NO	NO	NO	NO	NO	NO	.	.	.	.	.	.	.	.	.	.	.	14.648	150	16.55	442.705	430.74	1.95	52.5
3559	PREVENTER	147	148	1	Female	38.9	normal	0	0	0	0	NO	0	7.666	39.6	0.255789	67.3684	15.0316	1.55789	1.89474	11.2842	2.86316	NO	NO	NO	NO	NO	NO	NO	NO	NO	.	.	.	.	.	.	.	.	.	.	.	14.648	150	16.55	442.705	430.74	1.95	52.5
7911	PREVENTER	147	148	nursery	Female	38.8	normal	0	0	0	0	NO	0	7.31	51.3	0.240769	73.7155	16.3534	0.908521	1.15915	6.79825	1.06516	NO	YES	YES	NO	NO	NO	NO	NO	NO	.	.	.	.	.	.	.	.	.	.	.	14.648	150	16.55	442.705	430.74	1.95	52.5
4299	PREVENTER	1	2	1	Female	39.1	redness	0	0	0	0	YES	1.44	7.672	187.2	NA	NA	NA	NA	NA	NA	NA	NO	NO	NO	YES	NO	YES	NO	NO	NO	2.53	0.46	6.71	54.04	9.81	12144	41.74	4.41	1855	488.35	27.39	0	0	0.1	0	0	0	0
8480	PREVENTER	9	10	2	Female	38	normal	0	0	0	0	NO	0	6.596	200.6	0.370138	61.1615	21.1713	1.49473	2.03382	13.2075	0.931144	YES	NO	NO	NO	NO	NO	YES	YES	NO	11.21	1.26	0.18	12.8	13.86	4155	49.37	2.5	2173	592.52	88.09	4.11	0	4.31	91.02	103.32	0	0
3559	PREVENTER	16	17	2	Female	38.1	normal	0	0	0	0	NO	0	8.266	117.4	0.198278	69.2564	18.424	2.55272	2.38624	5.88235	1.49834	NO	NO	NO	NO	NO	NO	YES	YES	YES	9.2	0.48	6.71	12.8	60.39	4077	55.14	4.55	3420	554.46	73.34	4.647	30	5.47	107.485	122.01	0.39	10.5
2734	PREVENTER	117	118	2	Female	38.3	normal	0	0	0	0	NO	0	7.74	105.7	NA	NA	NA	NA	NA	NA	NA	NO	NO	NO	NO	NO	NO	NO	NO	NO	3.41	144.41	10.21	12.8	267.45	2693	124.33	0.33	1546	1823	70.48	12.94	150	15.19	373.515	363.42	1.95	52.5
7291	PREVENTER	117	118	1	Female	39.3	normal	0	0	0	0	NO	0.96	7.93	100.7	0.229507	70.2714	19.5505	0.636132	0.551315	8.10008	0.890585	NO	NO	NO	NO	NO	NO	NO	NO	NO	3.29	19.6	6.71	12.8	25.89	2795	43.34	0.33	145.83	487.81	94.33	12.94	150	15.19	373.515	363.42	1.95	52.5
596	PREVENTER	147	148	2	Female	38.9	normal	0	0	0	0	NO	0	7.25	42.9	0.292565	68.6799	17.7939	0.79566	1.15732	9.98192	1.59132	NO	NO	NO	NO	NO	NO	NO	NO	NO	.	.	.	.	.	.	.	.	.	.	.	14.648	150	16.55	442.705	430.74	1.95	52.5
7946	PREVENTER	147	148	2	Female	38.7	normal	0	0	0	0	NO	0	7.74	22.2	0.237021	74.2884	15.8918	0.996205	0.85389	6.64137	1.32827	NO	NO	NO	NO	NO	NO	NO	NO	NO	.	.	.	.	.	.	.	.	.	.	.	14.648	150	16.55	442.705	430.74	1.95	52.5
4365	PREVENTER	1	2	2	Female	39.3	redness	0	0	0	0	YES	1.44	7.692	125.3	NA	NA	NA	NA	NA	NA	NA	NO	NO	NO	YES	NO	NO	NO	NO	NO	22.58	0.46	6.71	12.8	18.32	148548	66.16	4.55	2409	1079	92.08	0	0	0.1	0	0	0	0
596	PREVENTER	16	17	2	Female	38.7	normal	1	0	0	0	YES	0.48	NA	NA	NA	NA	NA	NA	NA	NA	NA	NO	NO	NO	NO	NO	NO	YES	YES	YES	.	.	.	.	.	.	.	.	.	.	.	4.647	30	5.47	107.485	122.01	0.39	10.5
4365	PREVENTER	16	17	2	Female	38.7	normal	0	1	0	0	NO	0.72	7.713	146.6	0.248936	68.4786	17.641	2.32479	2.5641	7.82906	1.16239	NO	NO	NO	YES	NO	NO	YES	YES	YES	0.74	0.46	6.71	12.8	5.16	18446	63.16	2.85	661.55	676.96	34.01	4.647	30	5.47	107.485	122.01	0.39	10.5
2752	PREVENTER	117	118	2	Female	38.3	normal	0	0	0	0	NO	0	7.868	126.9	0.318208	80.3297	11.4286	0.686813	0.494505	6.51099	0.549451	NO	NO	NO	NO	NO	NO	NO	NO	NO	2.52	1.12	6.91	12.8	5.11	28290	33.79	1.2	107.32	623.89	43.67	12.94	150	15.19	373.515	363.42	1.95	52.5
7320	PREVENTER	117	118	2	Female	39.3	normal	0	0	0	0	YES	0.96	7.531	113.4	0.296776	69.0305	19.2101	0.493716	0.2693	9.69479	1.30162	YES	NO	NO	NO	NO	YES	NO	NO	NO	.	.	.	.	.	.	.	.	.	.	.	12.94	150	15.19	373.515	363.42	1.95	52.5
3991	PREVENTER	147	148	3	Female	39	normal	0	0	0	0	NO	0.96	7.782	60.8	0.319487	70.9265	17.9553	1.05431	1.34185	8.40256	0.319489	NO	NO	NO	NO	YES	NO	NO	NO	NO	.	.	.	.	.	.	.	.	.	.	.	14.648	150	16.55	442.705	430.74	1.95	52.5
7984	PREVENTER	147	148	2	Female	39	normal	0	0	0	0	NO	0.96	7.555	67.9	0.269972	71.4585	15.5269	1.01186	1.04676	10.7467	0.209351	YES	NO	NO	NO	NO	NO	NO	NO	NO	.	.	.	.	.	.	.	.	.	.	.	14.648	150	16.55	442.705	430.74	1.95	52.5
7320	PREVENTER	1	2	2	Female	38.8	normal	0	0	0	0	YES	0	NA	NA	NA	NA	NA	NA	NA	NA	NA	YES	NO	NO	NO	NO	YES	NO	NO	NO	14.46	0.46	6.71	12.8	4.04	19030	81.11	1.13	1477	744.2	152.63	0	0	0.1	0	0	0	0
645	PREVENTER	16	17	nursery	Female	38.6	normal	0	0	0	0	NO	0	8.473	128.2	0.171286	70.0586	18.2206	2.55727	2.61055	6.39318	0.15983	YES	NO	NO	YES	YES	YES	YES	YES	YES	7.46	39.39	6.71	12.8	4.04	27258	228.88	4.69	2073	1047	272.49	4.647	30	5.47	107.485	122.01	0.39	10.5
3054	PREVENTER	117	118	2	Female	38.7	normal	0	0	0	0	YES	0	NA	NA	NA	NA	NA	NA	NA	NA	NA	NO	NO	NO	NO	NO	NO	NO	NO	NO	.	.	.	.	.	.	.	.	.	.	.	12.94	150	15.19	373.515	363.42	1.95	52.5
7327	PREVENTER	117	118	1	Female	39	normal	0	0	0	0	NO	0.96	7.625	154.1	0.315066	68.4326	17.6836	0.694191	0.548045	11.3263	1.31531	NO	NO	NO	NO	NO	NO	NO	NO	NO	4.06	1.53	6.71	12.8	27.22	45888	49.9	1.35	505.08	360.93	43.16	12.94	150	15.19	373.515	363.42	1.95	52.5
744	PREVENTER	147	148	2	Female	39	normal	0	0	0	0	NO	0.96	7.318	95.6	0.219845	66.6667	18.018	0.982801	1.26945	11.6298	1.43325	NO	NO	NO	NO	NO	NO	NO	NO	NO	4.61	14.62	19.95	12.8	7.14	148548	172.99	2.28	1245	911.03	257.56	14.648	150	16.55	442.705	430.74	1.95	52.5
8076	PREVENTER	147	148	2	Female	38.7	normal	0	0	0	0	NO	0	7.403	89.3	0.256578	73.2319	16.2489	0.581916	0.402865	8.50492	1.02954	NO	NO	NO	NO	NO	NO	NO	NO	NO	3.86	22.48	0.18	46.9	13.86	32890	201.17	0.33	1103	719.23	291.59	14.648	150	16.55	442.705	430.74	1.95	52.5
7396	PREVENTER	1	2	1	Female	38.5	normal	0	0	0	0	YES	0	8.561	159.9	0.519155	76.4605	15.8076	1.03093	0.343643	6.35739	0	NO	NO	NO	NO	NO	NO	NO	NO	NO	63.75	0.46	6.71	12.8	4.04	11113	185.13	3.14	1431	1660	273.76	0	0	0.1	0	0	0	0
744	PREVENTER	16	17	2	Female	38.8	normal	0	0	0	0	NO	0	7.9	124.1	0.186161	59.9563	23.1441	3.05677	3.66812	8.29694	1.87773	NO	NO	NO	NO	NO	NO	YES	YES	YES	34.87	14.59	6.71	41.34	91.27	2260	144.7	5.95	2252	718.34	803.4	4.647	30	5.47	107.485	122.01	0.39	10.5
3220	PREVENTER	117	118	2	Female	38.5	normal	0	0	0	0	NO	0	7.833	100.6	0.286951	72.498	17.0057	0.976404	1.13914	7.16029	1.2205	NO	NO	NO	NO	NO	YES	NO	NO	NO	.	.	.	.	.	.	.	.	.	.	.	12.94	150	15.19	373.515	363.42	1.95	52.5
7396	PREVENTER	117	118	1	Female	39.7	normal	0	0	0	0	YES	0.96	NA	NA	NA	NA	NA	NA	NA	NA	NA	NO	NO	NO	NO	NO	NO	NO	NO	NO	.	.	.	.	.	.	.	.	.	.	.	12.94	150	15.19	373.515	363.42	1.95	52.5
929	PREVENTER	147	148	3	Female	38.8	normal	0	0	0	0	NO	0	7.74	95.6	0.250961	67.9134	18.8189	1.22047	1.65354	10.0394	0.354331	NO	NO	NO	NO	NO	NO	NO	NO	NO	0.37	2	6.71	123.8	4.04	148548	27.84	0.33	356.37	313.63	65.76	14.648	150	16.55	442.705	430.74	1.95	52.5
4365	PREVENTER	147	148	2	Female	38.8	normal	0	1	0	0	NO	0.72	7.099	91.8	0.447885	59.0334	25.0759	0.581984	0.759109	12.5	2.0496	NO	NO	NO	YES	NO	NO	NO	NO	NO	.	.	.	.	.	.	.	.	.	.	.	14.648	150	16.55	442.705	430.74	1.95	52.5
8480	PREVENTER	147	148	2	Female	38.6	normal	0	0	0	0	NO	0	5.975	67.9	0.217483	59.9944	19.7093	0.335477	0.223651	18.563	1.17417	YES	NO	NO	NO	NO	NO	NO	NO	NO	3.01	18.62	225.94	21.83	20.55	14139	410.93	15.77	325.54	361.69	2571	14.648	150	16.55	442.705	430.74	1.95	52.5
7741	PREVENTER	1	2	1	Female	39	normal	0	0	0	0	YES	0.96	7.44	97.2	0.319329	60.4413	24.5425	1.93757	2.20667	10.7104	0.161464	YES	NO	NO	NO	NO	NO	NO	NO	NO	40.29	0.46	6.71	12.8	4.04	148548	133.25	3.42	746.79	739.56	144.77	0	0	0.1	0	0	0	0
929	PREVENTER	16	17	3	Female	38.5	normal	0	0	0	0	NO	0	7.9334	103.9	0.202627	64.9733	20.8556	1.87166	2.1836	9.26916	0.846702	NO	NO	NO	NO	NO	NO	YES	YES	YES	9.97	0.46	6.71	12.8	76.55	136997	51.24	5.01	871.02	465.65	80.3	4.647	30	5.47	107.485	122.01	0.39	10.5
3291	PREVENTER	117	118	1	Female	39.2	normal	0	0	0	0	NO	0.96	7.652	100.2	0.217117	70.3329	18.8616	0.771828	0.62711	8.39363	1.01302	NO	NO	NO	NO	NO	NO	NO	NO	NO	2.32	26.09	12.45	12.8	33.88	148548	104.97	1.2	781.49	761.64	9943	12.94	150	15.19	373.515	363.42	1.95	52.5
7741	PREVENTER	117	118	1	Female	39.1	normal	0	0	0	0	YES	0.96	7.701	122.7	NA	NA	NA	NA	NA	NA	NA	YES	NO	NO	NO	NO	NO	NO	NO	NO	2.34	1.83	6.71	12.8	12.01	20344	152.68	0.99	3420	764.35	162.07	12.94	150	15.19	373.515	363.42	1.95	52.5
1139	PREVENTER	147	148	3	Female	38.6	normal	0	0	0	0	NO	0	7.729	42	0.241005	70.246	16.6509	1.13529	1.37181	9.36613	1.2299	NO	NO	NO	NO	NO	NO	NO	NO	NO	2.41	11.38	6.71	12.8	26.55	6344	105.77	0.33	700.67	266.5	556.12	14.648	150	16.55	442.705	430.74	1.95	52.5
6061	PREVENTER	147	148	1	Female	38.8	normal	0	0	0	0	YES	0	8.281	71	0.374905	78.4329	13.8108	0.91017	0.75188	5.26316	0.831025	NO	NO	NO	NO	NO	NO	NO	NO	NO	3.86	8.36	6.71	12.8	20.55	148548	161.1	1.06	1598	550.5	196.12	14.648	150	16.55	442.705	430.74	1.95	52.5
9729	PREVENTER	147	148	1	Female	39.1	normal	0	0	0	0	NO	0.96	7.39	100	0.373814	70.6499	16.6217	0.688829	0.748727	10.1827	1.10812	NO	NO	NO	NO	NO	NO	NO	NO	NO	2.41	2	0.18	12.8	4.04	148548	58.72	0.33	677.6	375.96	126.63	14.648	150	16.55	442.705	430.74	1.95	52.5
7984	PREVENTER	1	2	2	Female	38.7	normal	0	0	0	0	YES	0	7.263	144	NA	NA	NA	NA	NA	NA	NA	YES	NO	NO	NO	NO	NO	NO	NO	NO	.	.	.	.	.	.	.	.	.	.	.	0	0	0.1	0	0	0	0
1139	PREVENTER	16	17	3	Female	38.7	normal	0	0	0	0	YES	0	8.33	98.2	0.409142	72.591	15.3319	2.44111	2.14133	6.46681	1.02784	NO	NO	NO	NO	NO	NO	YES	YES	YES	9.89	0.46	6.71	12.8	24.55	3416	121.7	3.94	1071	443.91	254.37	4.647	30	5.47	107.485	122.01	0.39	10.5
4299	PREVENTER	58	59	3	Female	39	normal	0	0	2.5	2	NO	3.12	8.003	NA	NA	NA	NA	NA	NA	NA	NA	NO	NO	NO	YES	NO	YES	NO	NO	NO	7.12	2.33	6.71	12.8	105.74	723.52	188.41	23.8	2620	1323	1708	8.878	150	10.66	220.15	214.2	1.95	52.5
258	PREVENTER	30	31	3	Female	38	normal	0	0	1	1	NO	0.96	7.942	NA	0.17991	74.2641	16.5265	0.967199	0.841043	6.26577	1.13541	NO	NO	NO	NO	NO	NO	NO	YES	NO	18	1.05	6.71	12.8	4.04	16907	64.3	0.33	1892	505.68	361.27	6.293	110	7.6	149.11	169.26	1.43	38.5
7327	PREVENTER	30	31	1	Female	38.4	normal	0	0	0.5	0.5	NO	0.48	8.099	NA	0.287688	60.2384	20.599	3.02567	3.60636	10.2384	2.29218	NO	NO	NO	NO	NO	NO	NO	YES	NO	38.89	3.08	6.71	12.8	7.14	44446	107.89	3.22	1980	799.87	548.41	6.293	110	7.6	149.11	169.26	1.43	38.5
3559	PREVENTER	30	31	2	Female	40	normal	0	0	1.5	1.5	YES	2.4	8.81	NA	NA	NA	NA	NA	NA	NA	NA	NO	NO	NO	NO	NO	NO	NO	YES	NO	12.21	0.97	6.71	12.8	37.75	3217	133.68	3.56	1629	568.42	411.22	6.293	110	7.6	149.11	169.26	1.43	38.5
7984	PREVENTER	117	118	2	Female	39.1	normal	0	0	0	0	NO	0.96	7.984	NA	0.282833	68.9274	18.5772	1.17951	1.10579	10.0627	0.147438	YES	NO	NO	NO	NO	NO	NO	NO	NO	.	.	.	.	.	.	.	.	.	.	.	12.94	150	15.19	373.515	363.42	1.95	52.5
744	PREVENTER	91	92	2	Female	38.7	normal	0	0	0	0	NO	0	7.901	NA	0.167674	74.748	15.0616	1.06383	0.783875	7.67077	0.671892	NO	NO	NO	NO	NO	NO	NO	NO	NO	4.96	9.33	46.62	12.8	49.87	22644	229.14	1.35	736.78	670.57	1292	11.073	150	13.29	301.18	293.04	1.95	52.5
929	PREVENTER	117	118	3	Female	39	normal	0	0	0	0	NO	0.96	8.133	NA	0.24833	71.4341	18.5042	1.07941	0.925212	7.20894	0.848111	NO	NO	NO	NO	NO	NO	NO	NO	NO	0.97	2.16	6.71	77.87	23.22	69139	61.92	0.48	680.53	430.72	171.66	12.94	150	15.19	373.515	363.42	1.95	52.5
3054	PREVENTER	91	92	2	Female	38.9	normal	0	0	0	0.5	NO	0.24	7.343	NA	0.3349	65.1404	20.1537	0.668449	0.467914	11.5976	1.97193	NO	NO	NO	NO	NO	NO	NO	NO	NO	11.83	7.83	6.71	12.8	7.54	148548	117.25	0.33	1352	687.39	90.53	11.073	150	13.29	301.18	293.04	1.95	52.5
7946	PREVENTER	30	31	1	Female	38.5	normal	0	0	0	0	NO	0	6.731	NA	0.217316	63.3175	15.4578	0.802616	0.832342	18.8763	0.713436	NO	NO	NO	NO	NO	NO	NO	YES	NO	17.18	0.73	6.71	12.8	18.32	59908	30.95	0.33	1246	793.81	303.85	6.293	110	7.6	149.11	169.26	1.43	38.5
1654	PREVENTER	91	92	2	Female	39.2	normal	0	0	1	1	NO	1.92	7.865	NA	0.31788	71.7562	17.1696	1.35788	1.65963	6.42728	1.62945	NO	NO	NO	NO	NO	NO	NO	NO	NO	.	.	.	.	.	.	.	.	.	.	.	11.073	150	13.29	301.18	293.04	1.95	52.5
7741	PREVENTER	16	17	1	Female	38.6	normal	0	0	0.5	0.5	YES	0.48	NA	NA	NA	NA	NA	NA	NA	NA	NA	YES	NO	NO	NO	NO	NO	YES	YES	YES	4.97	1.09	6.71	12.8	4.04	13165	134.24	5.04	1451	661.84	291.61	4.647	30	5.47	107.485	122.01	0.39	10.5
1139	PREVENTER	91	92	3	Female	38.7	normal	0	0	0	0	NO	0	8.174	113.1	0.317163	71.8935	17.7515	1.11769	1.08481	6.34451	1.80802	NO	NO	NO	NO	NO	NO	NO	NO	NO	22.79	6.44	6.71	12.8	29.89	74510	162.17	0.41	2541	962.1	169.77	11.073	150	13.29	301.18	293.04	1.95	52.5
645	PREVENTER	30	31	nursery	Female	38.7	normal	0	0	0	0	YES	0	NA	NA	NA	NA	NA	NA	NA	NA	NA	YES	NO	NO	YES	YES	YES	NO	YES	NO	1.83	17.34	6.71	12.8	7.54	148548	120.93	5.11	155.03	729.27	569.82	6.293	110	7.6	149.11	169.26	1.43	38.5
1654	PREVENTER	30	31	1	Female	39.5	normal	0	0	0	0	NO	0.96	7.916	151.9	0.233357	68.8006	19.5216	1.82905	1.93458	6.54238	1.37179	NO	NO	NO	NO	NO	NO	NO	YES	NO	.	.	.	.	.	.	.	.	.	.	.	6.293	110	7.6	149.11	169.26	1.43	38.5
9729	PREVENTER	9	10	1	Female	38.6	normal	0	0	0	0	NO	0	6.515	206.9	0.373664	60.0794	39.9206	0	0	0	0	NO	NO	NO	NO	NO	NO	YES	YES	NO	1.25	0.46	0.18	12.8	39.22	35178	39.17	2.93	2146	638.62	131.45	4.11	0	4.31	91.02	103.32	0	0
3559	PREVENTER	58	59	2	Female	38.8	normal	0	0	1.5	1	NO	1.2	7.871	134.2	0.237629	69.8364	19.5637	0.715746	0.681663	7.4983	1.70416	NO	NO	NO	NO	NO	NO	NO	NO	NO	5.43	5.14	6.71	12.8	4.04	18830	75.99	3.7	2062	632.84	84.95	8.878	150	10.66	220.15	214.2	1.95	52.5
7984	PREVENTER	16	17	2	Female	38.9	normal	0	0	0	0	YES	0	8.818	96.2	NA	NA	NA	NA	NA	NA	NA	YES	NO	NO	NO	NO	NO	YES	YES	YES	.	.	.	.	.	.	.	.	.	.	.	4.647	30	5.47	107.485	122.01	0.39	10.5
4365	PREVENTER	16	17	2	Female	38.7	normal	0	1	0	0	NO	0.72	7.713	146.6	0.248936	68.4786	17.641	2.32479	2.5641	7.82906	1.16239	NO	NO	NO	YES	NO	NO	YES	YES	YES	0.74	0.46	6.71	12.8	5.16	18446	63.16	2.85	661.55	676.96	34.01	4.647	30	5.47	107.485	122.01	0.39	10.5
929	PREVENTER	91	92	3	Female	38.5	normal	0	0	1	0	NO	0.48	7.626	128.1	0.299084	69.4201	21.0236	0.777454	0.58309	7.74214	0.453515	NO	NO	NO	NO	NO	NO	NO	NO	NO	2.95	0.54	8.75	12.8	63.2	36892	77.62	0.91	384.38	501.56	1161	11.073	150	13.29	301.18	293.04	1.95	52.5
4365	PREVENTER	58	59	2	Female	38.6	normal	0	0	0	1.5	NO	0.72	8.37	119	0.22249	74.0756	15.5882	1.80672	1.93277	5.54622	1.05042	NO	NO	NO	YES	NO	NO	NO	NO	NO	30.97	0.46	6.71	12.8	9.81	148548	39.7	1.06	420.16	572.44	106.02	8.878	150	10.66	220.15	214.2	1.95	52.5
3054	PREVENTER	30	31	1	Female	38.6	normal	0	0	1	1	NO	0.96	7.82	174.9	0.19219	69.7899	18.2773	1.34454	1.42857	8.78151	0.378151	NO	NO	NO	NO	NO	NO	NO	YES	NO	5.94	0.46	6.71	12.8	4.04	148548	144.45	1.86	854.36	594.98	400.7	6.293	110	7.6	149.11	169.26	1.43	38.5
7984	PREVENTER	30	31	2	Female	38.8	normal	0	0	0	0	NO	0	7.448	168.1	0.162433	67.4112	22.9358	0.95732	0.638213	7.25967	0.797766	YES	NO	NO	NO	NO	NO	NO	YES	NO	.	.	.	.	.	.	.	.	.	.	.	6.293	110	7.6	149.11	169.26	1.43	38.5
3220	PREVENTER	91	92	2	Female	39.1	normal	0	0	1	0.5	NO	1.68	7.36	159.8	0.345197	67.8503	20.8413	0.573614	0.382409	8.98662	1.36575	NO	NO	NO	NO	NO	YES	NO	NO	NO	4.31	18.12	10.21	12.8	128.89	4112	176.29	0.33	2338	794.69	5547	11.073	150	13.29	301.18	293.04	1.95	52.5
1139	PREVENTER	9	10	3	Female	NA	normal	0	0	0	0	NO	0	8.077	NA	0.114063	62.9412	24.7451	1.56863	1.68627	8.66667	0.392157	NO	NO	NO	NO	NO	NO	YES	YES	NO	8.86	0.46	6.71	12.8	9.84	15759	61.92	1.92	1870	484.78	90.18	4.11	0	4.31	91.02	103.32	0	0
3991	PREVENTER	9	10	2	Female	38.2	normal	0	0	0	0	NO	0	7.95	143.2	0.205531	67.0432	26.2458	0.697674	1.0299	4.75083	0.232558	NO	NO	NO	NO	YES	NO	YES	YES	NO	.	.	.	.	.	.	.	.	.	.	.	4.11	0	4.31	91.02	103.32	0	0
8076	PREVENTER	91	92	2	Female	38.8	normal	0	0	1	0	NO	0.48	7.629	146.3	0.243547	68.2453	20.6814	0.715503	0.545145	8.68825	1.12436	NO	NO	NO	NO	NO	NO	NO	NO	NO	6.75	0.78	1.54	12.8	4.04	13633	50.84	0.99	83.27	577.91	480.19	11.073	150	13.29	301.18	293.04	1.95	52.5
7291	PREVENTER	1	2	1	Female	39.5	normal	0	0	0	0	YES	0.96	8.204	112.2	0.245743	68.5693	20.3113	2.74277	2.37213	4.596	1.40845	NO	NO	NO	NO	NO	NO	NO	NO	NO	9.83	4.12	6.71	12.8	13.19	1579	109.08	0.77	3420	526.49	86.01	0	0	0.1	0	0	0	0
4299	PREVENTER	1	2	1	Female	39.1	redness	0	0	0	0	YES	1.44	7.672	187.2	NA	NA	NA	NA	NA	NA	NA	NO	NO	NO	YES	NO	YES	NO	NO	NO	2.53	0.46	6.71	54.04	9.81	12144	41.74	4.41	1855	488.35	27.39	0	0	0.1	0	0	0	0
7396	PREVENTER	1	2	1	Female	38.5	normal	0	0	0	0	YES	0	8.561	159.9	0.519155	76.4605	15.8076	1.03093	0.343643	6.35739	0	NO	NO	NO	NO	NO	NO	NO	NO	NO	63.75	0.46	6.71	12.8	4.04	11113	185.13	3.14	1431	1660	273.76	0	0	0.1	0	0	0	0
6061	PREVENTER	9	10	1	Female	38.5	normal	0	0	1	1	NO	0.96	7.76	182.7	0.302495	63.177	29.8877	0.924703	0.792602	4.98679	0.231176	NO	NO	NO	NO	NO	NO	YES	YES	NO	82.21	0.46	6.71	12.8	4.04	7469	209.66	2.64	3420	1112	251.32	4.11	0	4.31	91.02	103.32	0	0
744	PREVENTER	117	118	2	Female	38.6	normal	0	0	0	0	YES	0	8.146	108	NA	NA	NA	NA	NA	NA	NA	NO	NO	NO	NO	NO	NO	NO	NO	NO	3.26	3.83	8.75	12.8	15.2	26361	44.28	0.91	395.63	412.4	76.73	12.94	150	15.19	373.515	363.42	1.95	52.5
7327	PREVENTER	117	118	1	Female	39	normal	0	0	0	0	NO	0.96	7.625	154.1	0.315066	68.4326	17.6836	0.694191	0.548045	11.3263	1.31531	NO	NO	NO	NO	NO	NO	NO	NO	NO	4.06	1.53	6.71	12.8	27.22	45888	49.9	1.35	505.08	360.93	43.16	12.94	150	15.19	373.515	363.42	1.95	52.5
3220	PREVENTER	58	59	nursery	Female	39	normal	0	0	1.5	2	NO	2.64	7.85	124.7	0.19862	67.4863	19.3078	0.956284	0.819672	10.1093	1.32058	NO	NO	NO	NO	NO	YES	NO	NO	NO	8.96	21.89	6.71	12.8	16.25	27733	138.78	5.39	3420	881.61	202.77	8.878	150	10.66	220.15	214.2	1.95	52.5
744	PREVENTER	30	31	2	Female	39.2	normal	0	0	1	1	YES	1.92	7.769	147.3	0.348479	68.6975	19.4441	1.12181	0.987065	7.61546	1.5495	NO	NO	NO	NO	NO	NO	NO	YES	NO	47.58	9.74	6.71	35.41	12.52	7435	130.87	4.01	2415	640.56	243.45	6.293	110	7.6	149.11	169.26	1.43	38.5
6061	PREVENTER	58	59	1	Female	39	normal	0	1	2	1	YES	3.12	8.289	123.8	NA	NA	NA	NA	NA	NA	NA	NO	NO	NO	NO	NO	NO	NO	NO	NO	26.1	0.61	6.71	12.8	21.89	12813	62.99	3.22	749.01	565.68	89.42	8.878	150	10.66	220.15	214.2	1.95	52.5
9729	PREVENTER	91	92	1	Female	39.1	normal	2	0	0	0	NO	1.92	7.779	145.9	0.363127	76.3336	14.8118	0.595722	0.487409	7.06742	0.704035	NO	NO	NO	NO	NO	NO	NO	NO	NO	7.22	30.74	6.91	12.8	89.93	148548	198.08	2.79	1098	598.19	16330	11.073	150	13.29	301.18	293.04	1.95	52.5
645	PREVENTER	16	17	nursery	Female	38.6	normal	0	0	0	0	NO	0	8.473	128.2	0.171286	70.0586	18.2206	2.55727	2.61055	6.39318	0.15983	YES	NO	NO	YES	YES	YES	YES	YES	YES	7.46	39.39	6.71	12.8	4.04	27258	228.88	4.69	2073	1047	272.49	4.647	30	5.47	107.485	122.01	0.39	10.5
596	PREVENTER	30	31	2	Female	39.1	normal	0	0	0	0	NO	0.96	7.805	138.1	0.281162	73.0412	17.5548	0.758134	0.591488	6.37738	0.987221	NO	NO	NO	NO	NO	NO	NO	YES	NO	.	.	.	.	.	.	.	.	.	.	.	6.293	110	7.6	149.11	169.26	1.43	38.5
7320	PREVENTER	58	59	2	Female	40.3	normal	0	0	1	0.5	NO	4.56	7.807	139.2	0.180626	74.0152	16.0737	1.33418	1.20712	5.71792	1.65184	YES	NO	NO	NO	NO	YES	NO	NO	NO	12.58	0.89	6.71	12.8	46.96	5101	69.72	2.85	118.3	461.71	47.56	8.878	150	10.66	220.15	214.2	1.95	52.5
8480	PREVENTER	16	17	2	Female	38.6	normal	0	1	0	0	NO	0.72	7.881	160.7	0.296722	63.7168	21.37	1.27827	1.27827	11.275	1.08161	YES	NO	NO	NO	NO	NO	YES	YES	YES	10.5	2.36	1.54	12.8	17.88	13692	84.53	1.2	3199	664.46	138.57	4.647	30	5.47	107.485	122.01	0.39	10.5
2752	PREVENTER	117	118	2	Female	38.3	normal	0	0	0	0	NO	0	7.868	126.9	0.318208	80.3297	11.4286	0.686813	0.494505	6.51099	0.549451	NO	NO	NO	NO	NO	NO	NO	NO	NO	2.52	1.12	6.91	12.8	5.11	28290	33.79	1.2	107.32	623.89	43.67	12.94	150	15.19	373.515	363.42	1.95	52.5
3291	PREVENTER	91	92	1	Female	39.1	normal	0	0	0	0.5	YES	1.2	8.136	113.2	0.397695	73.8248	15.5225	0.743997	0.541089	8.28542	1.08218	NO	NO	NO	NO	NO	NO	NO	NO	NO	5.25	13.54	12.45	12.8	28.56	10507	257.18	2.72	699.85	735.03	3438	11.073	150	13.29	301.18	293.04	1.95	52.5
6061	PREVENTER	30	31	1	Female	38.7	normal	0	0	0	0	NO	0	8.476	108.8	0.194521	63.8081	20.5911	2.66473	3.19767	7.17054	2.56783	NO	NO	NO	NO	NO	NO	NO	YES	NO	37.84	4.15	25.62	12.8	7.82	2946	58.99	2.21	1067	638.62	3848	6.293	110	7.6	149.11	169.26	1.43	38.5
8480	PREVENTER	58	59	2	Female	39.5	normal	0	0	1.5	0.5	NO	1.92	7.162	159.3	0.394662	66.3866	22.5578	0.866597	0.735294	7.53676	1.91702	YES	NO	NO	NO	NO	NO	NO	NO	NO	23.24	0.92	0.18	12.8	31.22	18767	92.5	9.52	2256	493.83	71.66	8.878	150	10.66	220.15	214.2	1.95	52.5
1139	PREVENTER	117	118	3	Female	39.3	normal	0	0	0	0	NO	0.96	7.904	133.6	0.257163	66.4582	19.5465	0.977326	0.820954	9.96873	2.2283	NO	NO	NO	NO	NO	NO	NO	NO	NO	4.04	4.31	6.71	12.8	4.04	15214	75.1	0.34	572.53	478.06	57.05	12.94	150	15.19	373.515	363.42	1.95	52.5
9729	PREVENTER	1	2	1	Female	39	normal	0	1	0.5	0.5	YES	2.16	8.044	134.5	NA	NA	NA	NA	NA	NA	NA	NO	NO	NO	NO	NO	NO	NO	NO	NO	28.05	0.61	0.18	33.86	20.55	60133	38.37	2.36	3403	891.18	230.79	0	0	0.1	0	0	0	0
3991	PREVENTER	16	17	2	Female	38.8	normal	0	0	0	0	NO	0	7.805	103.8	NA	NA	NA	NA	NA	NA	NA	NO	NO	NO	NO	YES	NO	YES	YES	YES	.	.	.	.	.	.	.	.	.	.	.	4.647	30	5.47	107.485	122.01	0.39	10.5
4365	PREVENTER	117	118	2	Female	38.6	normal	0	0	0	0	NO	0	7.658	98.9	0.232008	68.2187	17.3926	0.871132	0.871132	11.8354	0.811054	NO	NO	NO	YES	NO	NO	NO	NO	NO	.	.	.	.	.	.	.	.	.	.	.	12.94	150	15.19	373.515	363.42	1.95	52.5
8076	PREVENTER	117	118	2	Female	38.8	normal	0	0	0	0	YES	0	7.506	132.8	0.405982	68.1145	21.7845	0.40404	0.23569	8.24916	1.21212	NO	NO	NO	NO	NO	NO	NO	NO	NO	6.7	4.09	0.18	12.8	4.04	3703	37.02	0.7	170.75	300.8	33.28	12.94	150	15.19	373.515	363.42	1.95	52.5
3291	PREVENTER	117	118	1	Female	39.2	normal	0	0	0	0	NO	0.96	7.652	100.2	0.217117	70.3329	18.8616	0.771828	0.62711	8.39363	1.01302	NO	NO	NO	NO	NO	NO	NO	NO	NO	2.32	26.09	12.45	12.8	33.88	148548	104.97	1.2	781.49	761.64	9943	12.94	150	15.19	373.515	363.42	1.95	52.5
8480	PREVENTER	117	118	2	Female	38.8	normal	0	0	0	0	NO	0	7.544	144.8	0.27513	66.9176	19.0216	0.650017	0.513171	11.974	0.923709	YES	NO	NO	NO	NO	NO	NO	NO	NO	4.09	1.43	0.18	17.82	16.54	6962	45.62	1.35	278.47	406.85	95.36	12.94	150	15.19	373.515	363.42	1.95	52.5
1654	PREVENTER	16	17	1	Female	NA	normal	0	0	0	0	NO	0	7.572	126	0.254391	66.7473	14.9326	1.10612	1.86657	14.8289	0.518493	NO	NO	NO	NO	NO	NO	YES	YES	YES	.	.	.	.	.	.	.	.	.	.	.	4.647	30	5.47	107.485	122.01	0.39	10.5
596	PREVENTER	117	85	2	Female	38.9	normal	0	0	0	0	YES	0	7.243	139.9	0.748076	73.3085	12.813	0.45285	0.266383	12.6532	0.506127	NO	NO	NO	NO	NO	NO	NO	NO	NO	.	.	.	.	.	.	.	.	.	.	.	12.94	150	15.19	373.515	363.42	1.95	52.5
7946	PREVENTER	117	118	2	Female	38.8	normal	0	0	0	0	NO	0	6.961	164.2	0.208025	65.1724	21.9363	0.450928	0.424403	11.2467	0.769231	NO	NO	NO	NO	NO	NO	NO	NO	NO	1.64	0.46	6.71	12.8	26.31	2446	165.04	0.33	193.04	414.89	300.68	12.94	150	15.19	373.515	363.42	1.95	52.5
7320	PREVENTER	117	118	2	Female	39.3	normal	0	0	0	0	YES	0.96	7.531	113.4	0.296776	69.0305	19.2101	0.493716	0.2693	9.69479	1.30162	YES	NO	NO	NO	NO	YES	NO	NO	NO	.	.	.	.	.	.	.	.	.	.	.	12.94	150	15.19	373.515	363.42	1.95	52.5
3220	PREVENTER	117	118	2	Female	38.5	normal	0	0	0	0	NO	0	7.833	100.6	0.286951	72.498	17.0057	0.976404	1.13914	7.16029	1.2205	NO	NO	NO	NO	NO	YES	NO	NO	NO	.	.	.	.	.	.	.	.	.	.	.	12.94	150	15.19	373.515	363.42	1.95	52.5
6061	PREVENTER	16	17	1	Female	39	normal	0	0	1	1	NO	1.92	8.448	77.1	0.171601	74.2066	15.753	2.42354	2.19273	5.19331	0.230814	NO	NO	NO	NO	NO	NO	YES	YES	YES	35.61	0.46	6.71	12.8	23.89	6008	68.05	5.52	3420	726.28	105.98	4.647	30	5.47	107.485	122.01	0.39	10.5
7291	PREVENTER	117	118	1	Female	39.3	normal	0	0	0	0	NO	0.96	7.93	100.7	0.229507	70.2714	19.5505	0.636132	0.551315	8.10008	0.890585	NO	NO	NO	NO	NO	NO	NO	NO	NO	3.29	19.6	6.71	12.8	25.89	2795	43.34	0.33	145.83	487.81	94.33	12.94	150	15.19	373.515	363.42	1.95	52.5
2734	PREVENTER	117	118	2	Female	38.3	normal	0	0	0	0	NO	0	7.74	105.7	NA	NA	NA	NA	NA	NA	NA	NO	NO	NO	NO	NO	NO	NO	NO	NO	3.41	144.41	10.21	12.8	267.45	2693	124.33	0.33	1546	1823	70.48	12.94	150	15.19	373.515	363.42	1.95	52.5
6061	PREVENTER	117	118	1	Female	38.7	normal	0	0	0	0	NO	0	8.761	53.2	NA	NA	NA	NA	NA	NA	NA	NO	NO	NO	NO	NO	NO	NO	NO	NO	8.74	1.46	6.71	12.8	16.54	85577	65.92	2	379.96	619.91	81.47	12.94	150	15.19	373.515	363.42	1.95	52.5
9729	PREVENTER	117	118	1	Female	39.1	normal	0	0	1	0.5	NO	1.68	7.535	123.5	0.339397	73.7432	14.8092	0.45427	0.333131	10.0545	0.605694	NO	NO	NO	NO	NO	NO	NO	NO	NO	4.06	78.34	0.18	12.8	20.55	79256	114.79	2.07	507.85	510.37	10175	12.94	150	15.19	373.515	363.42	1.95	52.5
7946	PREVENTER	147	148	2	Female	38.7	normal	0	0	0	0	NO	0	7.74	22.2	0.237021	74.2884	15.8918	0.996205	0.85389	6.64137	1.32827	NO	NO	NO	NO	NO	NO	NO	NO	NO	.	.	.	.	.	.	.	.	.	.	.	14.648	150	16.55	442.705	430.74	1.95	52.5
1654	PREVENTER	147	148	2	Female	38.8	normal	0	0	0	0	NO	0	7.414	71	0.293198	67.8711	18.7826	0.78125	1.07422	10.2214	1.26953	NO	NO	NO	NO	NO	NO	NO	NO	NO	.	.	.	.	.	.	.	.	.	.	.	14.648	150	16.55	442.705	430.74	1.95	52.5
3559	PREVENTER	147	148	1	Female	38.9	normal	0	0	0	0	NO	0	7.666	39.6	0.255789	67.3684	15.0316	1.55789	1.89474	11.2842	2.86316	NO	NO	NO	NO	NO	NO	NO	NO	NO	.	.	.	.	.	.	.	.	.	.	.	14.648	150	16.55	442.705	430.74	1.95	52.5
6063	PREVENTER	147	148	1	Female	39.1	normal	0	0	0	0	NO	0.96	7.792	57.8	NA	NA	NA	NA	NA	NA	NA	NO	NO	NO	NO	NO	NO	NO	NO	NO	.	.	.	.	.	.	.	.	.	.	.	14.648	150	16.55	442.705	430.74	1.95	52.5
744	PREVENTER	147	148	2	Female	39	normal	0	0	0	0	NO	0.96	7.318	95.6	0.219845	66.6667	18.018	0.982801	1.26945	11.6298	1.43325	NO	NO	NO	NO	NO	NO	NO	NO	NO	4.61	14.62	19.95	12.8	7.14	148548	172.99	2.28	1245	911.03	257.56	14.648	150	16.55	442.705	430.74	1.95	52.5
2752	PREVENTER	147	148	2	Female	39.1	normal	0	0	0	0	NO	0.96	7.843	111.3	0.191523	75.7533	14.9247	0.988701	1.17702	5.88512	1.27119	NO	NO	NO	NO	NO	NO	NO	NO	NO	2.83	4.89	135.83	107.65	24.55	10865	525.49	2.64	1211	499.79	9245	14.648	150	16.55	442.705	430.74	1.95	52.5
8076	PREVENTER	147	148	2	Female	38.7	normal	0	0	0	0	NO	0	7.403	89.3	0.256578	73.2319	16.2489	0.581916	0.402865	8.50492	1.02954	NO	NO	NO	NO	NO	NO	NO	NO	NO	3.86	22.48	0.18	46.9	13.86	32890	201.17	0.33	1103	719.23	291.59	14.648	150	16.55	442.705	430.74	1.95	52.5
7741	PREVENTER	147	148	1	Female	39	normal	0	0	0	0	NO	0.96	7.748	102.9	0.3099	71.6833	17.4394	0.713267	0.927247	8.91583	0.32097	YES	NO	NO	NO	NO	NO	NO	NO	NO	.	.	.	.	.	.	.	.	.	.	.	14.648	150	16.55	442.705	430.74	1.95	52.5
4365	PREVENTER	147	148	2	Female	38.8	normal	0	1	0	0	NO	0.72	7.099	91.8	0.447885	59.0334	25.0759	0.581984	0.759109	12.5	2.0496	NO	NO	NO	YES	NO	NO	NO	NO	NO	.	.	.	.	.	.	.	.	.	.	.	14.648	150	16.55	442.705	430.74	1.95	52.5
7327	PREVENTER	147	148	1	Female	39	normal	0	0	0	0	YES	0.96	6.567	88.6	0.510104	59.5051	24.5219	0.534308	0.618673	13.2171	1.60292	NO	NO	NO	NO	NO	NO	NO	NO	NO	6.81	1.06	6.71	54.73	15.2	52575	121.96	2.14	851.17	381.12	126.52	14.648	150	16.55	442.705	430.74	1.95	52.5
3054	PREVENTER	147	148	2	Female	38.8	normal	0	0	0	0	NO	0	8.181	57.5	0.240044	71.4545	15.2364	1.05455	1.45455	9.78182	1.01818	NO	NO	NO	NO	NO	NO	NO	NO	NO	.	.	.	.	.	.	.	.	.	.	.	14.648	150	16.55	442.705	430.74	1.95	52.5
7396	PREVENTER	147	148	1	Female	39.1	normal	0	0	0	0	YES	0.96	7.671	10.7	0.31973	71.4053	16.8635	0.692464	0.855397	9.3279	0.855397	NO	NO	NO	NO	NO	NO	NO	NO	NO	.	.	.	.	.	.	.	.	.	.	.	14.648	150	16.55	442.705	430.74	1.95	52.5
8480	PREVENTER	147	148	2	Female	38.6	normal	0	0	0	0	NO	0	5.975	67.9	0.217483	59.9944	19.7093	0.335477	0.223651	18.563	1.17417	YES	NO	NO	NO	NO	NO	NO	NO	NO	3.01	18.62	225.94	21.83	20.55	14139	410.93	15.77	325.54	361.69	2571	14.648	150	16.55	442.705	430.74	1.95	52.5
258	PREVENTER	147	148	3	Female	39.1	normal	0	0	0	0	NO	0.96	7.39	46.4	0.290518	66.2925	19.6921	0.898012	1.09044	10.3271	1.69981	NO	NO	NO	NO	NO	NO	NO	NO	NO	.	.	.	.	.	.	.	.	.	.	.	14.648	150	16.55	442.705	430.74	1.95	52.5
1139	PREVENTER	147	148	3	Female	38.6	normal	0	0	0	0	NO	0	7.729	42	0.241005	70.246	16.6509	1.13529	1.37181	9.36613	1.2299	NO	NO	NO	NO	NO	NO	NO	NO	NO	2.41	11.38	6.71	12.8	26.55	6344	105.77	0.33	700.67	266.5	556.12	14.648	150	16.55	442.705	430.74	1.95	52.5
7291	PREVENTER	147	148	1	Female	38.8	normal	0	0	0	0	NO	0	6.906	121.4	0.18013	69.5493	12.631	0.786164	0.838574	15.1468	1.04822	NO	NO	NO	NO	NO	NO	NO	NO	NO	7.83	5.05	6.71	12.8	24.55	5472	110.81	0.33	1828	531.02	302.64	14.648	150	16.55	442.705	430.74	1.95	52.5
7320	PREVENTER	147	148	2	Female	39.1	normal	0	0	0	0	NO	0.96	7.609	82	0.280291	69.6915	17.4955	0.689655	0.61706	10.49	1.01633	YES	NO	NO	NO	NO	YES	NO	NO	NO	.	.	.	.	.	.	.	.	.	.	.	14.648	150	16.55	442.705	430.74	1.95	52.5
3291	PREVENTER	147	148	1	Female	38.9	normal	0	0	0	0	NO	0	7.457	-110	0.319359	78.3274	12.8681	0.530035	0.530035	7.27326	0.471143	NO	NO	NO	NO	NO	NO	NO	NO	NO	0.75	6.51	6.71	49.57	4.04	19711	83.2	0.48	589.83	434.71	238.7	14.648	150	16.55	442.705	430.74	1.95	52.5
3220	PREVENTER	147	148	2	Female	38.5	normal	0	0	0	0	NO	0	6.753	47.7	0.242406	64.9861	18.3588	0.764951	0.938804	14.0125	0.938804	NO	NO	NO	NO	NO	YES	NO	NO	NO	.	.	.	.	.	.	.	.	.	.	.	14.648	150	16.55	442.705	430.74	1.95	52.5
2734	PREVENTER	147	148	2	Female	38.3	normal	0	0	0	0	NO	0	7.232	-101.5	0.268213	67.5758	20.3939	0.636364	0.818182	9.51515	1.06061	NO	NO	NO	NO	NO	NO	NO	NO	NO	.	.	.	.	.	.	.	.	.	.	.	14.648	150	16.55	442.705	430.74	1.95	52.5
3991	PREVENTER	147	148	3	Female	39	normal	0	0	0	0	NO	0.96	7.782	60.8	0.319487	70.9265	17.9553	1.05431	1.34185	8.40256	0.319489	NO	NO	NO	NO	YES	NO	NO	NO	NO	.	.	.	.	.	.	.	.	.	.	.	14.648	150	16.55	442.705	430.74	1.95	52.5
6061	PREVENTER	147	148	1	Female	38.8	normal	0	0	0	0	YES	0	8.281	71	0.374905	78.4329	13.8108	0.91017	0.75188	5.26316	0.831025	NO	NO	NO	NO	NO	NO	NO	NO	NO	3.86	8.36	6.71	12.8	20.55	148548	161.1	1.06	1598	550.5	196.12	14.648	150	16.55	442.705	430.74	1.95	52.5
9729	PREVENTER	147	148	1	Female	39.1	normal	0	0	0	0	NO	0.96	7.39	100	0.373814	70.6499	16.6217	0.688829	0.748727	10.1827	1.10812	NO	NO	NO	NO	NO	NO	NO	NO	NO	2.41	2	0.18	12.8	4.04	148548	58.72	0.33	677.6	375.96	126.63	14.648	150	16.55	442.705	430.74	1.95	52.5
7911	PREVENTER	147	148	nursery	Female	38.8	normal	0	0	0	0	NO	0	7.31	51.3	0.240769	73.7155	16.3534	0.908521	1.15915	6.79825	1.06516	NO	YES	YES	NO	NO	NO	NO	NO	NO	.	.	.	.	.	.	.	.	.	.	.	14.648	150	16.55	442.705	430.74	1.95	52.5
7984	PREVENTER	147	148	2	Female	39	normal	0	0	0	0	NO	0.96	7.555	67.9	0.269972	71.4585	15.5269	1.01186	1.04676	10.7467	0.209351	YES	NO	NO	NO	NO	NO	NO	NO	NO	.	.	.	.	.	.	.	.	.	.	.	14.648	150	16.55	442.705	430.74	1.95	52.5
596	PREVENTER	147	148	2	Female	38.9	normal	0	0	0	0	NO	0	7.25	42.9	0.292565	68.6799	17.7939	0.79566	1.15732	9.98192	1.59132	NO	NO	NO	NO	NO	NO	NO	NO	NO	.	.	.	.	.	.	.	.	.	.	.	14.648	150	16.55	442.705	430.74	1.95	52.5
929	PREVENTER	147	148	3	Female	38.8	normal	0	0	0	0	NO	0	7.74	95.6	0.250961	67.9134	18.8189	1.22047	1.65354	10.0394	0.354331	NO	NO	NO	NO	NO	NO	NO	NO	NO	0.37	2	6.71	123.8	4.04	148548	27.84	0.33	356.37	313.63	65.76	14.648	150	16.55	442.705	430.74	1.95	52.5
7911	PREVENTER	30	31	1	Female	39.1	normal	0	0	1	1	NO	1.92	8.288	138.2	0.278849	65.7168	17.6166	3.88601	4.05872	6.43351	2.28843	NO	YES	YES	NO	NO	NO	NO	YES	NO	.	.	.	.	.	.	.	.	.	.	.	6.293	110	7.6	149.11	169.26	1.43	38.5
6063	PREVENTER	91	92	1	Female	38.8	normal	0	0	0	0	NO	0	7.798	121.1	0.21208	69.8702	16.8713	0.666433	0.526131	11.1891	0.876885	NO	NO	NO	NO	NO	NO	NO	NO	NO	3.81	3.13	6.71	12.8	4.04	4212	86.78	1.28	860.66	713.14	274.4	11.073	150	13.29	301.18	293.04	1.95	52.5
7396	PREVENTER	91	92	1	Female	39.2	normal	0	0	0	1	YES	1.44	7.254	185.8	0.339304	66.8552	19.4432	1.00043	0.826446	10.3523	1.5224	NO	NO	NO	NO	NO	NO	NO	NO	NO	10.33	27.69	7.66	12.8	125.61	148548	389.07	0.33	757.7	858.65	15718	11.073	150	13.29	301.18	293.04	1.95	52.5
258	PREVENTER	58	59	3	Female	39	normal	0	0	0	0	NO	0.96	7.56	143.6	0.28956	74.6395	16.596	0.876449	0.904722	5.79587	1.18745	NO	NO	NO	NO	NO	NO	NO	NO	NO	6.84	2.6	6.71	12.8	4.04	4163	68.15	0.33	851.3	687.39	120.06	8.878	150	10.66	220.15	214.2	1.95	52.5
1139	PREVENTER	30	31	3	Female	38.7	normal	0	0	1	1	NO	0.96	6.665	136.8	0.321748	63.427	19.2923	0.70286	0.605914	14.6631	1.30877	NO	NO	NO	NO	NO	NO	NO	YES	NO	22.46	0.46	6.71	12.8	4.04	6380	98.86	1.92	1017	511.54	281.93	6.293	110	7.6	149.11	169.26	1.43	38.5
7946	PREVENTER	58	59	2	Female	38.8	normal	0	0	1	0	NO	0.48	8.175	76	0.255189	74.6773	16.8156	1.12546	1.09235	5.19695	1.09235	NO	NO	NO	NO	NO	NO	NO	NO	NO	11.55	0.46	6.71	12.8	61.28	148548	83.8	3.14	2638	825.86	142.51	8.878	150	10.66	220.15	214.2	1.95	52.5
7911	PREVENTER	91	92	nursery	Female	NA	NA	NA	NA	NA	NA	YES	0	NA	NA	NA	NA	NA	NA	NA	NA	NA	NO	YES	YES	NO	NO	NO	NO	NO	NO	.	.	.	.	.	.	.	.	.	.	.	11.073	150	13.29	301.18	293.04	1.95	52.5
8480	PREVENTER	91	92	2	Female	39.1	normal	0	0	0	0	NO	0.96	7.236	119	0.313469	71.5256	17.6332	0.679206	0.574713	8.33333	1.25392	YES	NO	NO	NO	NO	NO	NO	NO	NO	5.54	0.46	0.18	12.8	15.2	76126	71.64	0.91	657.81	585.26	142.95	11.073	150	13.29	301.18	293.04	1.95	52.5
2752	PREVENTER	9	10	2	Female	38.7	normal	0	0	0	0	NO	0	8.316	124	NA	NA	NA	NA	NA	NA	NA	NO	NO	NO	NO	NO	NO	YES	YES	NO	9.92	6.57	6.71	12.8	31.22	148548	79.22	2.21	2250	959.23	172.9	4.11	0	4.31	91.02	103.32	0	0
929	PREVENTER	9	10	3	Female	37.8	normal	0	0	0.5	0.5	NO	0.48	7.065	169.6	0.225321	66.0175	21.9023	1.15721	1.24189	8.63675	1.04431	NO	NO	NO	NO	NO	NO	YES	YES	NO	24.12	1.29	6.71	52.18	45.88	8.53	49.9	5.66	1625	389.12	254.3	4.11	0	4.31	91.02	103.32	0	0
8480	PREVENTER	9	10	2	Female	38	normal	0	0	0	0	NO	0	6.596	200.6	0.370138	61.1615	21.1713	1.49473	2.03382	13.2075	0.931144	YES	NO	NO	NO	NO	NO	YES	YES	NO	11.21	1.26	0.18	12.8	13.86	4155	49.37	2.5	2173	592.52	88.09	4.11	0	4.31	91.02	103.32	0	0
4299	PREVENTER	9	10	1	Female	38.8	normal	0	0	0.5	0.5	YES	0.48	7.819	157.4	0.215854	75.6372	22.1695	0.533491	0.592768	1.06698	0	NO	NO	NO	YES	NO	YES	YES	YES	NO	5.38	0.46	6.71	54.04	16.25	12639	63.3	5.53	2253	662.86	78.38	4.11	0	4.31	91.02	103.32	0	0
258	PREVENTER	1	2	2	Female	39.4	normal	0	0	0	0	YES	0.96	7.837	161.4	0.257452	68.4812	18.2907	2.39521	2.39521	6.26021	2.17746	NO	NO	NO	NO	NO	NO	NO	NO	NO	5.72	0.46	6.71	12.8	32.09	148548	63.58	3.85	889.86	607.64	40.29	0	0	0.1	0	0	0	0
3291	PREVENTER	16	17	1	Female	38.3	normal	0	0	0	0	NO	0	8.351	157.5	0.178559	75.9057	13.3566	2.18245	2.1388	5.58708	0.829332	NO	NO	NO	NO	NO	NO	YES	YES	YES	9.27	3.96	6.71	12.8	8.49	63885	87.19	6.66	237.87	843.87	101.4	4.647	30	5.47	107.485	122.01	0.39	10.5
8480	PREVENTER	1	2	2	Female	39.1	normal	0	0	0	0	NO	0.96	6.486	168.4	0.221655	45.2953	20.4512	3.50252	4.60077	20.095	6.05521	YES	NO	NO	NO	NO	NO	NO	NO	NO	9.03	0.46	0.18	12.8	71.21	19980	117.85	3.22	1887	709.88	141.28	0	0	0.1	0	0	0	0
6063	PREVENTER	1	2	1	Female	39.6	normal	0	0	0	0	NO	0.96	6.956	150.4	0.285118	43.1197	18.3805	4.14804	6.01093	21.3612	6.97963	NO	NO	NO	NO	NO	NO	NO	NO	NO	22.84	0.46	6.71	12.8	28.25	25033	97.99	6.08	3420	717.91	248.96	0	0	0.1	0	0	0	0
4299	PREVENTER	30	31	1	Female	39.4	normal	0	0	1	1	NO	1.92	7.576	154.2	0.24321	66.7139	28.8952	0.377715	0.566572	3.02172	0.424929	NO	NO	NO	YES	NO	YES	NO	YES	NO	2.56	0.46	6.71	12.8	14.15	781.84	43.33	3	764.69	700.6	1429	6.293	110	7.6	149.11	169.26	1.43	38.5
7327	PREVENTER	58	59	1	Female	38.8	normal	0	0	0	0	NO	0	6.606	163.1	0.342414	62.7211	22.0231	1.10823	1.03749	11.0823	2.02782	NO	NO	NO	NO	NO	NO	NO	NO	NO	8.45	0.46	6.71	12.8	4.04	47745	57.39	5.95	1085	508.03	58.88	8.878	150	10.66	220.15	214.2	1.95	52.5
2752	PREVENTER	91	92	2	Female	38.5	normal	0	0	0	1	NO	0.48	7.68	97.7	0.261167	75.6834	16.1475	0.731087	0.635728	5.91227	0.890019	NO	NO	NO	NO	NO	NO	NO	NO	NO	3.18	1.76	6.71	12.8	4.04	144565	58.85	1.63	702.97	759.09	72.31	11.073	150	13.29	301.18	293.04	1.95	52.5
3054	PREVENTER	1	2	1	Female	39.4	redness	0	0	0	0	NO	1.44	7.572	419.9	0.0842377	61.0949	23.3577	3.13869	3.28467	8.75912	0.364964	NO	NO	NO	NO	NO	NO	NO	NO	NO	7.96	0.46	6.71	12.8	4.04	5023	87.78	2	139.71	717.44	289.72	0	0	0.1	0	0	0	0
8480	PREVENTER	30	31	2	Female	38.6	normal	0	0	0	0	NO	0	7.454	159.8	0.441522	71.7188	18.0324	0.456517	0.342388	9.22164	0.228258	YES	NO	NO	NO	NO	NO	NO	YES	NO	19.38	2.89	3.3	12.8	4.04	11708	95.68	1.49	1135	732.85	175.57	6.293	110	7.6	149.11	169.26	1.43	38.5
7320	PREVENTER	9	10	2	Female	38.8	normal	0	0	0	0	NO	0	8.11	155.1	0.220081	57.1523	22.2185	5.2649	6.19205	8.27815	0.89404	YES	NO	NO	NO	NO	YES	YES	YES	NO	5.15	1.83	6.71	12.8	4.04	22737	44.92	2.21	2732	670.45	142.2	4.11	0	4.31	91.02	103.32	0	0
645	PREVENTER	1	2	1	Female	39.3	redness	1	0	0	0	YES	1.92	7.283	148.6	NA	NA	NA	NA	NA	NA	NA	YES	NO	NO	YES	YES	YES	NO	NO	NO	4.87	7.62	6.71	12.8	7.54	148548	93.31	13.92	2724	665.9	143.49	0	0	0.1	0	0	0	0
3054	PREVENTER	9	10	1	Female	38.6	normal	0	0	0	0	YES	0	6.616	198.7	0.212968	82.4849	15.2718	0	0.258844	1.98447	0	NO	NO	NO	NO	NO	NO	YES	YES	NO	21.88	3.58	289.03	12.8	4.04	148548	482.57	3.21	3069	807.79	4858	4.11	0	4.31	91.02	103.32	0	0
2752	PREVENTER	16	17	2	Female	39.1	normal	0	0	0	0	YES	0.96	7.766	120.6	0.260359	74.5394	18.753	0.519603	0.330657	5.76287	0.0944733	NO	NO	NO	NO	NO	NO	YES	YES	YES	12.16	1.8	6.71	12.8	33.88	148548	114.26	0.62	2291	988.39	143.76	4.647	30	5.47	107.485	122.01	0.39	10.5
7320	PREVENTER	16	17	2	Female	38.7	normal	0	0	0.5	0.5	NO	0.48	NA	NA	0.169737	60	24.5714	2.80519	2.85714	8.05195	1.71429	YES	NO	NO	NO	NO	YES	YES	YES	YES	8.08	0.46	6.71	12.8	4.04	31826	104.08	5.04	3249	868.54	422.55	4.647	30	5.47	107.485	122.01	0.39	10.5
744	PREVENTER	16	17	2	Female	38.8	normal	0	0	0	0	NO	0	7.9	124.1	0.186161	59.9563	23.1441	3.05677	3.66812	8.29694	1.87773	NO	NO	NO	NO	NO	NO	YES	YES	YES	34.87	14.59	6.71	41.34	91.27	2260	144.7	5.95	2252	718.34	803.4	4.647	30	5.47	107.485	122.01	0.39	10.5
7327	PREVENTER	91	92	1	Female	38.8	normal	0	0	1	0	YES	0.48	7.374	126.4	NA	NA	NA	NA	NA	NA	NA	NO	NO	NO	NO	NO	NO	NO	NO	NO	8.51	1.6	6.71	12.8	8.49	10107	64.05	1.63	416.18	479.29	119.76	11.073	150	13.29	301.18	293.04	1.95	52.5
6063	PREVENTER	16	17	1	Female	38.7	normal	0	1	0.5	0.5	NO	1.2	8.12	100.4	0.291859	81.6999	11.827	0.998185	0.998185	3.75076	0.725953	NO	NO	NO	NO	NO	NO	YES	YES	YES	9.17	12.76	6.71	12.8	9.81	3987	89.91	5.39	2317	712.18	99.28	4.647	30	5.47	107.485	122.01	0.39	10.5
7396	PREVENTER	30	31	1	Female	39.3	normal	0	0	0	0	NO	0.96	7.582	120.2	0.251665	70.5626	16.2669	0.566943	0.305277	11.6005	0.697776	NO	NO	NO	NO	NO	NO	NO	YES	NO	17.93	0.46	6.71	12.8	12.01	9828	88.63	1.5	1880	727.86	284.96	6.293	110	7.6	149.11	169.26	1.43	38.5
596	PREVENTER	1	2	2	Female	39.4	normal	0	0	0	0	NO	0.96	7.313	121.2	0.145472	66.7698	17.4505	2.22772	3.09406	8.47772	1.9802	NO	NO	NO	NO	NO	NO	NO	NO	NO	.	.	.	.	.	.	.	.	.	.	.	0	0	0.1	0	0	0	0
7911	PREVENTER	1	2	1	Female	39.9	normal	0	0	0	0	YES	0.96	7.163	78	0.569749	81.3312	11.7695	0.892857	0.324675	5.68182	0	NO	YES	YES	NO	NO	NO	NO	NO	NO	.	.	.	.	.	.	.	.	.	.	.	0	0	0.1	0	0	0	0
7291	PREVENTER	30	31	1	Female	39.4	normal	0	0	0.5	0.5	NO	1.44	7.92	112.4	NA	NA	NA	NA	NA	NA	NA	NO	NO	NO	NO	NO	NO	NO	YES	NO	8.45	12.16	24.67	12.8	11.18	4579	107.36	1.35	2317	595.62	1154	6.293	110	7.6	149.11	169.26	1.43	38.5
7396	PREVENTER	58	59	1	Female	39.2	normal	0	1	1	1	NO	2.64	7.66	100.1	0.254382	67.678	17.3948	1.21359	1.25405	11.2055	1.25405	NO	NO	NO	NO	NO	NO	NO	NO	NO	6.9	0.65	6.71	12.8	4.04	148548	115.27	0.33	1688	746.98	225.79	8.878	150	10.66	220.15	214.2	1.95	52.5
8076	PREVENTER	9	10	1	Female	38.9	normal	0	0	0	0	YES	0	7.346	114.3	0.467748	61.4871	33.9847	0	0.0953289	3.33651	1.09628	NO	NO	NO	NO	NO	NO	YES	YES	NO	7.46	2.79	0.18	15.66	4.04	43283	72.04	2.79	2121	715.68	103.75	4.11	0	4.31	91.02	103.32	0	0
7911	PREVENTER	58	59	nursery	Female	38.1	normal	0	1	2.5	2	NO	2.88	7.449	95.2	0.171976	64.7529	17.4738	1.3979	1.3979	13.7793	1.1982	NO	YES	YES	NO	NO	NO	NO	NO	NO	.	.	.	.	.	.	.	.	.	.	.	8.878	150	10.66	220.15	214.2	1.95	52.5
3291	PREVENTER	9	10	1	Female	38.3	normal	0	0	0	0	NO	0	8.382	82.8	NA	NA	NA	NA	NA	NA	NA	NO	NO	NO	NO	NO	NO	YES	YES	NO	12.01	0.02	6.71	12.8	8.49	139999	60.19	4.37	2132	995.76	420.57	4.11	0	4.31	91.02	103.32	0	0
1139	PREVENTER	58	59	3	Female	38.9	normal	0	0	1.5	1	YES	1.2	NA	NA	NA	NA	NA	NA	NA	NA	NA	NO	NO	NO	NO	NO	NO	NO	NO	NO	5.25	5.3	6.71	12.8	9.84	8492	100.99	2.36	851.17	495.62	143.93	8.878	150	10.66	220.15	214.2	1.95	52.5
7946	PREVENTER	16	17	1	Female	38.8	normal	0	0	0	0	YES	0	8.575	96.1	NA	NA	NA	NA	NA	NA	NA	NO	NO	NO	NO	NO	NO	YES	YES	YES	10.27	5.61	6.71	12.8	35.87	65668	126.31	1.71	3176	838.16	215.14	4.647	30	5.47	107.485	122.01	0.39	10.5
929	PREVENTER	30	31	3	Female	38.7	normal	0	0	0	0	NO	0	7.525	121.7	0.223796	71.9366	15.9258	0.811751	1.00503	9.00657	1.31426	NO	NO	NO	NO	NO	NO	NO	YES	NO	15.55	3.12	6.71	12.8	57.87	148548	61.92	2.36	2358	463.76	735.09	6.293	110	7.6	149.11	169.26	1.43	38.5
7327	PREVENTER	16	17	1	Female	38.9	normal	0	0	0.5	0.5	YES	0.48	8.358	95	0.298864	69.0114	20.8175	2.09125	1.42586	6.27376	0.380228	NO	NO	NO	NO	NO	NO	YES	YES	YES	9.89	2.1	6.71	12.8	6.47	2059	81.74	9.23	1564	714.34	46.35	4.647	30	5.47	107.485	122.01	0.39	10.5
7741	PREVENTER	58	59	1	Female	39	normal	0	1	1	1.5	YES	2.88	7.969	110.3	NA	NA	NA	NA	NA	NA	NA	YES	NO	NO	NO	NO	NO	NO	NO	NO	0.07	0.46	6.71	12.8	9.81	148548	97.7	1.28	1559	685.9	133.47	8.878	150	10.66	220.15	214.2	1.95	52.5
9729	PREVENTER	58	59	1	Female	39.6	normal	0	0	0	0	YES	0.96	7.573	115.6	NA	NA	NA	NA	NA	NA	NA	NO	NO	NO	NO	NO	NO	NO	NO	NO	11.86	0.46	6.71	12.8	26.31	148548	35.05	12.08	818.02	615.77	45.05	8.878	150	10.66	220.15	214.2	1.95	52.5
7984	PREVENTER	58	59	2	Female	38.7	normal	0	0	0	0	NO	0	8.115	85	0.262763	72.1573	18.3139	0.53135	0.354233	7.79313	0.850159	YES	NO	NO	NO	NO	NO	NO	NO	NO	.	.	.	.	.	.	.	.	.	.	.	8.878	150	10.66	220.15	214.2	1.95	52.5
3291	PREVENTER	58	59	1	Female	38.1	normal	0	1	1	1	NO	1.68	7.915	91.1	NA	NA	NA	NA	NA	NA	NA	NO	NO	NO	NO	NO	NO	NO	NO	NO	6.23	1.53	6.71	12.8	4.04	12135	75.5	2.21	889.28	662.1	106.61	8.878	150	10.66	220.15	214.2	1.95	52.5
7741	PREVENTER	91	92	1	Female	38.9	normal	0	0	0	0	NO	0	7.626	110	0.18194	71.2687	18.9232	1.22601	1.01279	7.40938	0.159915	YES	NO	NO	NO	NO	NO	NO	NO	NO	0.09	0.46	28.01	12.8	20.35	4373	93.59	1.42	1087	586.61	881.38	11.073	150	13.29	301.18	293.04	1.95	52.5
7984	PREVENTER	91	92	2	Female	38.8	normal	0	0	1.5	1	NO	1.2	8.41	53.1	0.215351	78.1984	13.9252	0.652742	0.435161	6.09225	0.696258	YES	NO	NO	NO	NO	NO	NO	NO	NO	.	.	.	.	.	.	.	.	.	.	.	11.073	150	13.29	301.18	293.04	1.95	52.5
2752	PREVENTER	30	31	2	Female	39.2	normal	0	0	1	1	NO	1.92	7.495	124.8	0.368166	74.375	18.05	0.575	0.4	5.725	0.875	NO	NO	NO	NO	NO	NO	NO	YES	NO	6.75	1.26	6.71	12.8	23.22	16479	106.3	0.33	2159	794.14	229.7	6.293	110	7.6	149.11	169.26	1.43	38.5
3559	PREVENTER	91	92	2	Female	38.9	normal	0	0	1.5	0.5	NO	0.96	6.966	120.6	0.189842	70.2792	17.2667	0.551065	0.440852	10.7641	0.698016	NO	NO	NO	NO	NO	NO	NO	NO	NO	3.03	11.48	6.71	12.8	4.04	3662	69.3	0.33	1163	776.96	135.91	11.073	150	13.29	301.18	293.04	1.95	52.5
6063	PREVENTER	58	59	1	Female	39.1	normal	0	2	0.5	0	NO	2.64	7.963	91.5	0.273889	72.1298	16.5923	1.82556	1.54158	6.97769	0.933063	NO	NO	NO	NO	NO	NO	NO	NO	NO	4.38	1.95	6.71	12.8	4.04	5333	51.26	3.14	631.94	510.1	106.14	8.878	150	10.66	220.15	214.2	1.95	52.5
2734	PREVENTER	58	59	2	Female	39	normal	0	0	0	0	NO	0.96	7.888	84.5	0.228973	72.198	17.6526	0.902864	0.622665	7.87671	0.747198	NO	NO	NO	NO	NO	NO	NO	NO	NO	8.83	9.77	6.71	12.8	20.35	12354	99.4	0.33	962.25	693.77	251.97	8.878	150	10.66	220.15	214.2	1.95	52.5
9729	PREVENTER	30	31	1	Female	38.9	normal	0	0	0	0	YES	0	7.765	115.9	0.260879	75.4407	15.0641	1.12179	1.16186	6.29006	0.921474	NO	NO	NO	NO	NO	NO	NO	YES	NO	24.24	2.16	6.91	12.8	11.18	8.53	75.23	1.63	3420	682.18	1296	6.293	110	7.6	149.11	169.26	1.43	38.5
596	PREVENTER	58	59	2	Female	38.7	normal	0	0	0	0	YES	0	7.718	109.3	NA	NA	NA	NA	NA	NA	NA	NO	NO	NO	NO	NO	NO	NO	NO	NO	.	.	.	.	.	.	.	.	.	.	.	8.878	150	10.66	220.15	214.2	1.95	52.5
1654	PREVENTER	58	59	2	Female	38.9	normal	0	1	1	2	NO	2.16	7.756	111.2	0.254313	73.0665	16.2144	1.28901	1.32293	6.98779	1.1194	NO	NO	NO	NO	NO	NO	NO	NO	NO	.	.	.	.	.	.	.	.	.	.	.	8.878	150	10.66	220.15	214.2	1.95	52.5
258	PREVENTER	91	92	3	Female	39	normal	0	0	0	0	NO	0.96	7.459	124.5	0.197932	65.6059	19.9936	0.96432	0.996464	11.0897	1.35005	NO	NO	NO	NO	NO	NO	NO	NO	NO	19.36	0.81	6.71	12.8	4.04	21694	16.23	0.33	60.54	641.24	67.41	11.073	150	13.29	301.18	293.04	1.95	52.5
7320	PREVENTER	30	31	2	Female	39	normal	0	0	0	0	NO	0.96	7.623	122.1	0.235547	70.3081	16.8868	2.04082	2.32093	7.0028	1.44058	YES	NO	NO	NO	NO	YES	NO	YES	NO	37.12	0.46	6.71	12.8	4.04	21908	85.08	1.57	3420	620.07	196.8	6.293	110	7.6	149.11	169.26	1.43	38.5
7291	PREVENTER	91	92	1	Female	38.9	normal	0	0	0	0	NO	0	7.362	123.5	0.193102	69.0853	17.1944	0.967458	0.659631	11.1258	0.967458	NO	NO	NO	NO	NO	NO	NO	NO	NO	7.75	26.9	6.91	12.8	52.54	2840	46.82	1.06	822.63	868.72	1819	11.073	150	13.29	301.18	293.04	1.95	52.5
7741	PREVENTER	30	31	1	Female	39.8	normal	0	0	0.5	0.5	NO	1.44	NA	NA	0.248484	67.7973	19.7925	1.43655	1.67598	7.86113	1.43655	YES	NO	NO	NO	NO	NO	NO	YES	NO	0.07	0.46	6.71	12.8	10.91	148548	77.55	1.93	1022	503.78	256.92	6.293	110	7.6	149.11	169.26	1.43	38.5
6061	PREVENTER	91	92	1	Female	39.1	normal	0	0	0	0	NO	0.96	8.465	94.8	0.179571	72.4808	15.7336	1.76783	1.59104	6.59988	1.82675	NO	NO	NO	NO	NO	NO	NO	NO	NO	12.04	0.46	6.71	12.8	4.04	16919	48.56	1.71	627.93	659.74	204.7	11.073	150	13.29	301.18	293.04	1.95	52.5
744	PREVENTER	58	59	2	Female	39.6	normal	0	0	0	0	YES	0.96	7.777	89.6	NA	NA	NA	NA	NA	NA	NA	NO	NO	NO	NO	NO	NO	NO	NO	NO	7.86	7.52	6.71	12.8	24.55	9563	86.12	4.22	638.5	475.6	58.51	8.878	150	10.66	220.15	214.2	1.95	52.5
929	PREVENTER	16	17	3	Female	38.5	normal	0	0	0	0	NO	0	7.9334	103.9	0.202627	64.9733	20.8556	1.87166	2.1836	9.26916	0.846702	NO	NO	NO	NO	NO	NO	YES	YES	YES	9.97	0.46	6.71	12.8	76.55	136997	51.24	5.01	871.02	465.65	80.3	4.647	30	5.47	107.485	122.01	0.39	10.5
7327	PREVENTER	1	2	1	Female	38.1	redness	1	0	0	0	YES	0.96	7.226	129	0.19088	74.4828	15.5172	1.31034	1.44828	7.24138	0	NO	NO	NO	NO	NO	NO	NO	NO	NO	10.21	0.46	6.71	12.8	9.16	19996	87.98	6.95	714.35	782.59	99.04	0	0	0.1	0	0	0	0
8076	PREVENTER	58	59	2	Female	39	normal	0	0.5	0	0	NO	1.32	7.808	95.7	0.358054	72.5056	16.1435	0.588565	0.588565	9.13677	1.037	NO	NO	NO	NO	NO	NO	NO	NO	NO	9.03	0.46	0.18	12.8	4.04	83392	62.72	3.65	2256	592.52	59.85	8.878	150	10.66	220.15	214.2	1.95	52.5
7946	PREVENTER	1	2	1	Female	39.2	redness	0	0	0	0	NO	1.44	8.114	128.9	0.200447	72.8074	16.891	1.85615	1.90255	5.15081	1.39211	NO	NO	NO	NO	NO	NO	NO	NO	NO	11.42	2.87	6.71	12.8	4.04	52282	83.24	2.28	809.44	595.54	226.05	0	0	0.1	0	0	0	0
2752	PREVENTER	58	59	2	Female	38.3	normal	0	0	0	0	NO	0	7.948	90.4	0.271908	71.1822	16.2774	1.25764	1.07797	9.05498	1.14984	NO	NO	NO	NO	NO	NO	NO	NO	NO	0.47	0.46	6.71	12.8	17.88	51085	48.83	1.35	314.51	618.92	67.44	8.878	150	10.66	220.15	214.2	1.95	52.5
3559	PREVENTER	1	2	2	Female	39	redness	0	0	0	0	NO	1.44	7.363	125.4	0.356494	47.8279	25.4066	4.09718	5.64134	13.4445	3.58246	NO	NO	NO	NO	NO	NO	NO	NO	NO	2.02	1.72	6.71	12.8	20.35	6804	42.6	1.57	418.71	328.96	45.46	0	0	0.1	0	0	0	0
3220	PREVENTER	16	17	2	Female	39.1	normal	0	0	0	0	YES	0.96	7.115	142	0.379508	50.3851	32.85	0	0.0906208	16.2211	0.453104	NO	NO	NO	NO	NO	YES	YES	YES	YES	11.27	2.75	6.71	12.8	90.61	5468	140.19	1.28	1952	624.35	3785	4.647	30	5.47	107.485	122.01	0.39	10.5
744	PREVENTER	9	10	2	Female	38.8	normal	1	0	0.5	0.5	NO	0.96	7.537	154.3	0.237439	64.7266	22.8334	1.2472	1.0873	8.50656	1.59898	NO	NO	NO	NO	NO	NO	YES	YES	NO	16.23	11.94	6.71	54.73	4.04	3952	63.12	2.07	388.94	723.64	65.04	4.11	0	4.31	91.02	103.32	0	0
3559	PREVENTER	16	17	2	Female	38.1	normal	0	0	0	0	NO	0	8.266	117.4	0.198278	69.2564	18.424	2.55272	2.38624	5.88235	1.49834	NO	NO	NO	NO	NO	NO	YES	YES	YES	9.2	0.48	6.71	12.8	60.39	4077	55.14	4.55	3420	554.46	73.34	4.647	30	5.47	107.485	122.01	0.39	10.5
6063	PREVENTER	30	31	1	Female	39	normal	0	0	0	0	NO	0.96	6.72	116	0.231524	64.8532	21.3563	0.531377	0.480769	11.9433	0.83502	NO	NO	NO	NO	NO	NO	NO	YES	NO	28.4	8.7	7.66	12.8	4.04	5343	67.72	4.83	2617	662.86	339.77	6.293	110	7.6	149.11	169.26	1.43	38.5
9729	PREVENTER	16	17	1	Female	37.5	normal	0	0	0	0	NO	0	8.384	108.2	0.189478	73.3302	15.9351	2.05153	2.05153	6.29771	0.333969	NO	NO	NO	NO	NO	NO	YES	YES	YES	6.17	4.76	49.51	87.28	44.54	8.53	89.58	4.37	3420	1016	205.07	4.647	30	5.47	107.485	122.01	0.39	10.5
6061	PREVENTER	1	2	1	Female	38	redness	0	0	0	0	NO	0.48	7.26	-77.8	0.38452	49.4918	23.414	3.50508	5.09989	16.0182	2.47108	NO	NO	NO	NO	NO	NO	NO	NO	NO	8.33	0.46	6.71	12.8	4.04	23615	41.06	3.51	1642	481.74	71.48	0	0	0.1	0	0	0	0
645	PREVENTER	9	10	1	Female	38.6	normal	0	0	0	0	NO	0	7.822	67.4	NA	NA	NA	NA	NA	NA	NA	YES	NO	NO	YES	YES	YES	YES	YES	NO	14.91	1.05	6.71	12.8	4.04	26172	95.43	2	864.37	615.77	62.06	4.11	0	4.31	91.02	103.32	0	0
3291	PREVENTER	30	31	1	Female	39	normal	0	0	0	0	YES	0.96	7.443	62.1	0.227152	75.6318	15.2773	0.754432	0.490381	7.09166	0.754432	NO	NO	NO	NO	NO	NO	NO	YES	NO	6.67	1.83	6.71	12.8	4.04	39024	97.27	1.78	2751	606.85	507.63	6.293	110	7.6	149.11	169.26	1.43	38.5
3220	PREVENTER	1	2	2	Female	38.5	redness	0	0	0	0	YES	0.48	7.72	-30.4	NA	NA	NA	NA	NA	NA	NA	NO	NO	NO	NO	NO	YES	NO	NO	NO	19.52	2.03	6.71	12.8	4.04	148548	51.26	2.57	3420	1079	107.61	0	0	0.1	0	0	0	0
7291	PREVENTER	58	59	1	Female	39	normal	0	1	0	1	NO	2.16	7.82	116.9	0.205537	75.4448	15.342	0.948992	0.751285	6.28707	1.22578	NO	NO	NO	NO	NO	NO	NO	NO	NO	3.23	1.39	6.71	12.8	13.86	3751	100.72	1.63	1124	663.52	124.86	8.878	150	10.66	220.15	214.2	1.95	52.5
1139	PREVENTER	1	2	2	Female	38.9	normal	0	0	0	0	NO	0	6.644	148.3	0.39325	46.799	26.681	3.64807	5.40057	17.1137	0.357654	NO	NO	NO	NO	NO	NO	NO	NO	NO	43.32	0.46	6.71	12.8	15.2	46657	212.5	1.92	3420	853.25	206.42	0	0	0.1	0	0	0	0
8076	PREVENTER	30	31	1	Female	39.1	normal	0	0	0	0	NO	0.96	7.275	134.4	0.210213	70.5832	15.5385	0.808855	0.553427	11.7071	0.808855	NO	NO	NO	NO	NO	NO	NO	YES	NO	23.43	5.24	0.18	12.8	19.21	39254	164.04	1.06	3420	1032	490.16	6.293	110	7.6	149.11	169.26	1.43	38.5
744	PREVENTER	1	2	2	Female	39	normal	0	0	0	0	NO	0.96	7.49	135.2	0.18342	61.6999	21.7614	2.81618	4.04506	8.29493	1.38249	NO	NO	NO	NO	NO	NO	NO	NO	NO	3.18	15.32	6.71	88.29	9.16	3065	94.35	1.2	1052	773.84	63	0	0	0.1	0	0	0	0
3054	PREVENTER	58	59	2	Female	38.7	normal	0	0	0	0	NO	0	7.547	80.9	0.268539	69.815	19.5716	0.876339	0.746511	7.59494	1.39565	NO	NO	NO	NO	NO	NO	NO	NO	NO	2.02	0.46	6.71	12.8	5.16	148548	58.15	2.57	958.04	478.5	61.48	8.878	150	10.66	220.15	214.2	1.95	52.5
929	PREVENTER	58	59	3	Female	38.6	normal	0	0	0	0	NO	0	7.755	85.5	0.258653	68.6881	19.5402	0.792707	0.713436	8.79905	1.46651	NO	NO	NO	NO	NO	NO	NO	NO	NO	4.81	2.06	6.71	12.8	56.54	148548	37.02	1.63	743.64	481.74	89.77	8.878	150	10.66	220.15	214.2	1.95	52.5
3991	PREVENTER	58	59	2	Female	38.7	normal	1	0	1.5	2	NO	2.16	8.015	129	0.338646	74.6619	15.78	1.84851	2.0514	4.53111	1.12714	NO	NO	NO	NO	YES	NO	NO	NO	NO	.	.	.	.	.	.	.	.	.	.	.	8.878	150	10.66	220.15	214.2	1.95	52.5
2734	PREVENTER	30	31	2	Female	39	normal	0	0	0	0	NO	0.96	7.242	136	0.302822	71.8809	18.3762	0.541272	0.405954	8.14614	0.649526	NO	NO	NO	NO	NO	NO	NO	YES	NO	7.02	0.46	6.71	12.8	4.04	25479	106.2	1.13	1162	490.95	591.53	6.293	110	7.6	149.11	169.26	1.43	38.5
7741	PREVENTER	1	2	1	Female	39	normal	0	0	0	0	YES	0.96	7.44	97.2	0.319329	60.4413	24.5425	1.93757	2.20667	10.7104	0.161464	YES	NO	NO	NO	NO	NO	NO	NO	NO	40.29	0.46	6.71	12.8	4.04	148548	133.25	3.42	746.79	739.56	144.77	0	0	0.1	0	0	0	0
2734	PREVENTER	16	17	2	Female	39	normal	0	0.5	0.5	0.5	NO	1.8	8.017	103.2	0.234788	70.1068	19.6916	1.38395	1.02807	6.88019	0.90945	NO	NO	NO	NO	NO	NO	YES	YES	YES	15.66	2.06	6.71	12.8	12.01	11099	62.73	4.83	1513	811.26	119.2	4.647	30	5.47	107.485	122.01	0.39	10.5
6063	PREVENTER	9	10	1	Female	38.1	normal	0	0	0.5	0.5	YES	0.48	8.132	97.3	NA	NA	NA	NA	NA	NA	NA	NO	NO	NO	NO	NO	NO	YES	YES	NO	12.39	2.79	6.71	12.8	41.46	7240	59.01	3.28	2016	863.19	135.18	4.11	0	4.31	91.02	103.32	0	0
3291	PREVENTER	1	2	1	Female	39.1	redness	0	1	0	0	NO	2.16	6.91	46.9	0.157166	73.7022	14.2077	2.04918	3.00546	6.48907	0.546448	NO	NO	NO	NO	NO	NO	NO	NO	NO	26.43	0.46	6.71	12.8	9.81	86058	82.24	14.06	3420	1551	127.49	0	0	0.1	0	0	0	0
2752	PREVENTER	1	2	2	Female	39	normal	0	0	0	0	NO	0.96	6.646	122.2	0.186979	72.6961	15.988	2.14316	3.08616	4.58637	1.50021	NO	NO	NO	NO	NO	NO	NO	NO	NO	13.58	2.69	6.71	12.8	19.21	27749	105.5	1.35	2103	662.58	161.31	0	0	0.1	0	0	0	0
3991	PREVENTER	91	92	2	Female	39.1	normal	0	0	1	1	NO	1.92	7.265	145.1	0.266957	68.9887	17.8218	0.49505	0.459689	10.9972	1.23762	NO	NO	NO	NO	YES	NO	NO	NO	NO	.	.	.	.	.	.	.	.	.	.	.	11.073	150	13.29	301.18	293.04	1.95	52.5
7946	PREVENTER	91	92	2	Female	39.1	normal	0	0	0	1	YES	1.44	NA	NA	NA	NA	NA	NA	NA	NA	NA	NO	NO	NO	NO	NO	NO	NO	NO	NO	6.84	1.36	6.71	12.8	26.31	5798	75.13	1.86	1975	570.15	121.46	11.073	150	13.29	301.18	293.04	1.95	52.5
2734	PREVENTER	91	92	2	Female	38.8	normal	0	0	0	0	NO	0	7.286	137.6	0.215962	68.846	19.3283	0.535906	0.428725	10.0393	0.821722	NO	NO	NO	NO	NO	NO	NO	NO	NO	2.78	63.5	6.71	12.8	112.4	3668	87.78	0.33	194.3	983.39	82.95	11.073	150	13.29	301.18	293.04	1.95	52.5
4299	PREVENTER	91	92	nursery	Female	39.1	normal	0	0	1.5	1.5	NO	2.4	7.852	95.1	0.247317	84.8086	8.77193	0.637959	0.358852	5.14354	0.279107	NO	NO	NO	YES	NO	YES	NO	NO	NO	4.53	1.13	6.71	12.8	4.04	2583	216.21	17.45	2249	1769	1177	11.073	150	13.29	301.18	293.04	1.95	52.5
4365	PREVENTER	9	10	2	Female	38.8	normal	0	0	0	0	YES	0	NA	NA	0.233192	77.3802	13.4627	1.698	1.63736	4.6695	1.15221	NO	NO	NO	YES	NO	NO	YES	YES	NO	8.96	0.46	6.71	12.8	4.04	26266	57.29	4.97	902.45	856.16	67.93	4.11	0	4.31	91.02	103.32	0	0
8076	PREVENTER	1	2	1	Female	39.2	redness	0	0	0	0	YES	1.44	8.2	105.2	NA	NA	NA	NA	NA	NA	NA	NO	NO	NO	NO	NO	NO	NO	NO	NO	16.56	0.46	0.18	54.73	8.49	113622	70.44	2.07	3216	708.54	78.14	0	0	0.1	0	0	0	0
929	PREVENTER	1	2	2	Female	39.5	normal	0	0	0	0	NO	0.96	7.513	118	0.440053	41.3519	24.8907	6.00398	9.26441	17.4155	1.07356	NO	NO	NO	NO	NO	NO	NO	NO	NO	9.59	0.46	6.71	12.8	20.55	8.53	50.04	6.81	242.6	401.94	187.41	0	0	0.1	0	0	0	0
3723	PREVENTER	1	2	2	Female	39.1	normal	0	0	0	0	NO	0.96	7.317	137.3	0.200727	59.9888	20.8193	2.97419	3.42312	12.514	0.280584	NO	NO	NO	NO	NO	NO	NO	NO	NO	14.43	0.46	6.71	12.8	30.18	10042	154.1	2.64	1080	830.54	101.92	0	0	0.1	0	0	0	0
1139	PREVENTER	16	17	3	Female	38.7	normal	0	0	0	0	YES	0	8.33	98.2	0.409142	72.591	15.3319	2.44111	2.14133	6.46681	1.02784	NO	NO	NO	NO	NO	NO	YES	YES	YES	9.89	0.46	6.71	12.8	24.55	3416	121.7	3.94	1071	443.91	254.37	4.647	30	5.47	107.485	122.01	0.39	10.5
3723	PREVENTER	9	10	1	Female	36.5	normal	0	0	0	0	NO	0	8.038	113.6	0.238223	67.5127	21.7378	1.88116	2.17976	5.70319	0.985369	NO	NO	NO	NO	NO	NO	YES	YES	NO	5.4	0.46	6.71	12.8	18.32	1734	64.87	1.28	804.27	741.42	102.96	4.11	0	4.31	91.02	103.32	0	0
2734	PREVENTER	9	10	2	Female	38.6	normal	0	0	0.5	0.5	YES	0.48	NA	NA	NA	NA	NA	NA	NA	NA	NA	NO	NO	NO	NO	NO	NO	YES	YES	NO	20.12	2.64	6.71	12.8	26.31	148548	116.4	1.71	3420	1173	175.13	4.11	0	4.31	91.02	103.32	0	0
4365	PREVENTER	30	31	2	Female	38.9	normal	0	0	0	0	NO	0	7.958	107.1	0.2642	69.5529	19.7303	1.59688	1.56139	6.31654	1.24202	NO	NO	NO	YES	NO	NO	NO	YES	NO	4.53	3.88	6.71	12.8	4.04	58044	85.51	2.28	442.92	525.02	190.88	6.293	110	7.6	149.11	169.26	1.43	38.5
7396	PREVENTER	9	10	1	Female	38.2	normal	0	0	0	0	NO	0	7.801	138.4	0.176983	66.3964	23.2266	1.17552	1.01338	7.82327	0.364816	NO	NO	NO	NO	NO	NO	YES	YES	NO	16.35	0.46	6.71	12.8	4.04	7913	45.21	3.14	221.09	596.09	83.95	4.11	0	4.31	91.02	103.32	0	0
3991	PREVENTER	30	31	2	Female	38.7	normal	0	0	0	0	YES	0	7.762	123.4	0.289047	66.6667	22.3524	1.12847	1.04167	6.42361	2.38715	NO	NO	NO	NO	YES	NO	NO	YES	NO	.	.	.	.	.	.	.	.	.	.	.	6.293	110	7.6	149.11	169.26	1.43	38.5
7984	PREVENTER	1	2	2	Female	38.7	normal	0	0	0	0	YES	0	7.263	144	NA	NA	NA	NA	NA	NA	NA	YES	NO	NO	NO	NO	NO	NO	NO	NO	.	.	.	.	.	.	.	.	.	.	.	0	0	0.1	0	0	0	0
8076	PREVENTER	16	17	1	Female	38.7	normal	0	0	0	0	NO	0	NA	NA	0.218469	69.8344	19.2429	0.90694	0.709779	7.61041	1.69558	NO	NO	NO	NO	NO	NO	YES	YES	YES	57.9	3.18	0.68	12.8	7.14	35748	184.64	1.56	3420	1139	204.2	4.647	30	5.47	107.485	122.01	0.39	10.5
7291	PREVENTER	16	17	1	Female	38.3	normal	0	0	0	0	NO	0	7.852	71.9	0.176831	68.1863	20.8824	2.0098	1.66667	7.10784	0.147059	NO	NO	NO	NO	NO	NO	YES	YES	YES	6.06	10.86	6.71	12.8	5.79	3058	113.33	0.33	3420	777.6	154.36	4.647	30	5.47	107.485	122.01	0.39	10.5
258	PREVENTER	16	17	3	Female	38.9	normal	0	0	0	0	NO	0	8.053	94.3	0.250027	65.6146	19.4579	2.93353	3.4534	6.7954	1.74527	NO	NO	NO	NO	NO	NO	YES	YES	YES	10.77	1.21	6.71	12.8	43.3	42113	51.84	4.97	1582	674.46	101.98	4.647	30	5.47	107.485	122.01	0.39	10.5
7291	PREVENTER	9	10	1	Female	38.8	normal	0	2	1.5	1.5	YES	2.88	5.505	164.9	0.312135	68.0322	25.1646	0	0.0731529	5.70593	1.02414	NO	NO	NO	NO	NO	NO	YES	YES	NO	31.14	4.53	6.71	12.8	31.22	10006	102.32	0.91	3420	921.03	313.98	4.11	0	4.31	91.02	103.32	0	0
4299	PREVENTER	16	17	1	Female	39	normal	0	0	0.5	0.5	NO	1.44	8.04	773.5	NA	NA	NA	NA	NA	NA	NA	NO	NO	NO	YES	NO	YES	YES	YES	YES	2.27	0.46	6.71	12.8	90.61	2035	71.72	16.71	1945	637.05	76.12	4.647	30	5.47	107.485	122.01	0.39	10.5
3559	PREVENTER	9	10	2	Female	38.2	normal	0	0	0	0	NO	0	7.556	155.2	0.275339	62.4393	29.6021	0.905856	0.905856	4.17341	1.97347	NO	NO	NO	NO	NO	NO	YES	YES	NO	10.83	0.46	6.71	12.8	57.73	41939	87.78	4.55	3420	481.8	479.86	4.11	0	4.31	91.02	103.32	0	0
7911	PREVENTER	9	10	1	Female	38.8	normal	0	0	0	0	YES	0	7.303	183.2	0.492483	55.8372	43.0673	0.187793	0.125196	0.782473	0	NO	YES	YES	NO	NO	NO	YES	YES	NO	.	.	.	.	.	.	.	.	.	.	.	4.11	0	4.31	91.02	103.32	0	0
7327	PREVENTER	9	10	1	Female	38.9	normal	0	0	0	0	NO	0	8.431	159.6	0.236825	78.9347	20.5046	0	0	0.560673	0	NO	NO	NO	NO	NO	NO	YES	YES	NO	13.2	4.73	6.71	12.8	35.22	3498	53.51	9.37	1555	837.58	292.3	4.11	0	4.31	91.02	103.32	0	0
258	PREVENTER	9	10	3	Female	37.5	normal	0	0	0	0	NO	0	7.639	151.2	0.205789	58.3594	26.8629	2.66124	3.35003	8.57858	0.187852	NO	NO	NO	NO	NO	NO	YES	YES	NO	5.28	3.17	6.71	12.8	32.09	3378	47.95	1.13	722.3	631.26	207.6	4.11	0	4.31	91.02	103.32	0	0
7911	PREVENTER	16	17	1	Female	38.6	normal	0	0	0	0	YES	0	5.639	172.7	0.210441	79.7448	20.2552	0	0	0	0	NO	YES	YES	NO	NO	NO	YES	YES	YES	.	.	.	.	.	.	.	.	.	.	.	4.647	30	5.47	107.485	122.01	0.39	10.5
7741	PREVENTER	9	10	1	Female	38.6	normal	0	0	0	0	NO	0	7.364	136	0.273521	66.7457	32.6216	0	0.0790826	0.553578	0	YES	NO	NO	NO	NO	NO	YES	YES	NO	3.06	0.46	6.71	12.8	14.15	148548	92.17	0.33	2369	640.19	161.88	4.11	0	4.31	91.02	103.32	0	0
[truncated: 14 more columns]
