# Supplementary material for: Decoding the dynamics of calves’ respiratory and gut microbiota: exploring stability, resistance, and individual patterns
Source: Research Square preprint supplement (doi:10.21203/rs.3.rs-6411889/v1), 2025-04-10
Supplement: Supplementary file 2 [file ed3ae057998ac779ccc01c70.docx]

**Supplementary Figure S1. Microbial dynamics and cytokine profiles in nasal and fecal microbiota over time**

(a-b) Rarefaction curves for all samples in nasal cavity (a) and feces (b), showing the sequencing depth and species richness; (c) Temporal abundance of key fecal microbial families, represented in distinct colors; (d) Temporal abundance of dominant fecal microbial genera, depicted with color coding; (e) Principal Component Analysis (PCA) of the Kyoto Encyclopedia of Genes and Genomes Orthology (KO) from feces (purple) and nasal samples (green), illustrating the overlap of samples based on their putative functional profiles; (f) The evolution of the top 5 most abundant microbial pathways in nasal cavity across time, highlighting changes in microbial functional contributions; g) Upset intersection size plot showing the common microbial functional pathways between feces and nasal microbiotas, as well as those exclusive to each niche; (h) Boxplots of the levels of each of the individual cytokines across various time points, providing insights into cytokine dynamics over the study period.

# **Supplementary Tables**

**Supplementary Table S1**. **Metadata of calves recruited in the experimental cohort.** Summary of project metadata, encompassing physiological, clinical, and environmental variables. Clinical data encompasses rectal temperature, ocular mucosa examination, couching, lung sounds, and respiratory and diarrhea scores. Gut physiological parameters include pH, redox potential, SCFAs, biomass. Dietary details specify type, composition, and feeding schedule. Seasonal parameters consider temperature, humidity, and other weather-related conditions at sampling times. Collective and individual antibiotic treatments are specified.

**Supplementary Table S2**. **ASV counts detected in the nasal and fecal microbiota for each individual.** Each ASV is categorized from kingdom to species level based on taxonomic classification. The table includes abundance data for each ASV across individual nasal and fecal samples, illustrating the distribution and dynamics of microbial communities in these distinct environments.

**Supplementary Table S3**. **Summary of microbial abundance by sample type, time point, and phylum.** The table includes the type of sample (e.g., nasal or fecal), the corresponding collection time point, the identified microbial phyla, and their respective abundances. This information provides a detailed overview of phylum-level microbiota composition dynamics across different sample types and developmental stages.

**Supplementary Table S4** **Composition of the fecal core microbiota, detailing genus-level taxonomy alongside associated metadata.** Each row includes the genus, corresponding time point of sample collection, and taxonomic classification, spanning phylum, class, order, family, and genus. The table also lists the mean abundance of each genus, providing insights into its prevalence and persistence within the fecal core microbiota over time.

**Supplementary Table S5.** **Composition of the nasal core microbiota, detailing genus-level taxonomy alongside associated metadata.** Each row includes the genus, the corresponding time point of sample collection, and taxonomic classification, spanning phylum, class, order, family, and genus. The table also provides the mean abundance of each genus, offering insights into its prevalence and dynamics within the nasal core microbiota across developmental stages.

**Supplementary Table S6. Summary of the 289 KEGG Orthology (KO) groups identified in fecal samples.** Each KO is annotated via the KEGG database and analyzed using PICRUSt2 to predict functional pathways. The tables provide detailed information on the KO codes, their associated pathways, and the relative abundance across all analyzed fecal samples.

**Supplementary Table S7. Summary of the 297 KEGG Orthology (KO) groups observed in nasal samples.** Each KO is annotated via the KEGG database and analyzed using PICRUSt2 to predict functional pathways. The tables provide detailed information on the KO codes, their associated pathways, and the relative abundance across all analyzed nasal samples.

**Supplementary Table S8. Significant correlations between fecal microbiota genera and 11 plasmatic cytokines.** The table presents Spearman correlation values alongside adjusted p-values for each genus-cytokine pair, highlighting significant associations.

**Supplementary Table S9. Significant correlations between nasal microbiota genera and 11 plasmatic cytokines.** The table presents Spearman correlation values alongside adjusted p-values for each genus-cytokine pair, highlighting significant associations.
